1 **A bacteria-based assay to study SARS-CoV-2 protein-protein interactions**

2

3 Running title: Bacteria-based SARS-CoV-2 protein interactome

4

5 Benjamin L. Springstein<sup>1#</sup>, Padraig Deighan<sup>1</sup>, Grzegorz Grabe<sup>1</sup>, Ann Hochschild<sup>1#</sup>

6

7 <sup>1</sup> Department of Microbiology, Harvard Medical School, Boston, MA 02115, USA

8

9

10 # Corresponding authors:

11 [ahochschild@hms.harvard.edu](mailto:ahochschild@hms.harvard.edu)

12 [benjamin\\_springstein@hms.harvard.edu](mailto:benjamin_springstein@hms.harvard.edu)

13 **Abstract**

14 Methods for detecting and dissecting the interactions of virally encoded proteins are essential  
15 for probing basic viral biology and providing a foundation for therapeutic advances. The dearth  
16 of targeted therapeutics for the treatment of COVID-19, an ongoing global health crisis,  
17 underscores the importance of gaining a deeper understanding of the interactions of SARS-  
18 CoV-2-encoded proteins. Here we describe the use of a convenient bacteria-based two-hybrid  
19 (B2H) system to analyze the SARS-CoV-2 proteome. We identify sixteen distinct intraviral  
20 protein-protein interactions (PPIs), involving sixteen proteins. We find that many of the identified  
21 proteins interact with more than one partner. We further show how our system facilitates the  
22 genetic dissection of these interactions, enabling the identification of selectively disruptive  
23 mutations. We also describe a modified B2H system that permits the detection of disulfide bond-  
24 dependent PPIs in the normally reducing *Escherichia coli* cytoplasm and we use this system to  
25 detect the interaction of the SARS-CoV-2 spike protein receptor-binding domain (RBD) with its  
26 cognate cell surface receptor ACE2. We then examine how the RBD-ACE2 interaction is  
27 perturbed by several RBD amino acid substitutions found in currently circulating SARS-CoV-2  
28 variants. Our findings illustrate the utility of a genetically tractable bacterial system for probing  
29 the interactions of viral proteins and investigating the effects of emerging mutations. In principle,  
30 the system could also facilitate the identification of potential therapeutics that disrupt specific  
31 interactions of virally encoded proteins. More generally, our findings establish the feasibility of  
32 using a B2H system to detect and dissect disulfide bond-dependent interactions of eukaryotic  
33 proteins.

## 34 **Importance**

35 Understanding how virally encoded proteins interact with one another is essential in elucidating  
36 basic viral biology, providing a foundation for therapeutic discovery. Here we describe the use of  
37 a versatile bacteria-based system to investigate the interactions of the protein set encoded by  
38 SARS-CoV-2, the virus responsible for the current pandemic. We identify sixteen distinct  
39 intraviral protein-protein interactions, involving sixteen proteins, many of which interact with  
40 more than one partner. Our system facilitates the genetic dissection of these interactions,  
41 enabling the identification of selectively disruptive mutations. We also describe a modified  
42 version of our bacteria-based system that permits detection of the interaction between the  
43 SARS-CoV-2 spike protein (specifically its receptor binding domain) and its cognate human cell  
44 surface receptor ACE2 and we investigate the effects of spike mutations found in currently  
45 circulating SARS-CoV-2 variants. Our findings illustrate the general utility of our system for  
46 probing the interactions of virally encoded proteins.

## 47 **Introduction**

48           The causative agent of COVID-19, SARS-CoV-2, like SARS-CoV (hereafter SARS-CoV-  
49 1) and the Middle East respiratory syndrome coronavirus (MERS-CoV), is a zoonotic pathogen  
50 that belongs to the genus of  $\beta$ -coronaviruses [1,2]. A ~30 kb single stranded (+)-sense RNA  
51 virus, SARS-CoV-2 encodes 16 non-structural proteins (Nsp1-Nsp16), which are transcribed  
52 from two major open reading frames (ORF1a and ORF1b) and later post-translationally  
53 processed by proteases to give rise to the individual Nsps [3]. The main function of the Nsps is  
54 to provide and maintain the replication and transcription complex (RTC), promoting viral RNA  
55 synthesis by the RNA-dependent RNA polymerase Nsp12 [3]. However, the Nsps have also  
56 been implicated in other viral processes such as host innate immune system evasion – for  
57 example, by suppressing aspects of the interferon response [4]. The virus also encodes four  
58 structural proteins, the membrane (M) protein, the nucleocapsid (N) protein, the envelope (E)  
59 protein and the spike (S) glycoprotein, and at least six accessory proteins (ORF3a, ORF6,  
60 ORF7a, ORF7b, ORF8 and ORF10) [5]. The main function of coronavirus structural proteins is  
61 to mediate cell entry, virus particle assembly and release from the host cells by budding, though  
62 like the Nsps, structural proteins also participate in immune evasion. By contrast, the accessory  
63 proteins are non-conserved and highly variable among different coronavirus species; although  
64 their functional roles remain largely unknown, they too have been associated with immune  
65 evasion and disease severity [3].

66           Given the ongoing global crisis caused by the SARS-CoV-2 pandemic and the  
67 continuing need for targeted therapeutics for the treatment of COVID-19, understanding the  
68 intraviral and viral-host protein-protein interactions (PPIs) of SARS-CoV-2 remains a priority. An  
69 extensive virus-virus and host-virus PPI study recently highlighted the importance of Nsp10 as a  
70 potential inducer of the so-called cytokine storm (a dysregulated and hyperactive immune  
71 response) [6], thought to be the main cause for severe disease outcome and death in COVID-19

72 patients [2]. Li *et al.* (2021) further identified Nsp8 as a SARS-CoV-2 PPI hub [6], promoting  
73 interactions with other Nsp8s, accessory proteins, and one structural protein. Similar  
74 observations were previously also obtained for SARS-CoV-1 Nsp8 [7]. These findings suggest  
75 that Nsp8 and Nsp10 might provide particularly efficacious targets for drug development.

76 The SARS-CoV-2 spike protein, which is present on the viral surface as trimers, consists  
77 of two functionally distinct subunits, S1 and S2 [8,9]. The membrane-distal S1 subunit uses its  
78 receptor-binding domain (RBD) to initiate the process of viral entry into human host cells by  
79 binding to the cell surface protein angiotensin-converting enzyme 2 (ACE2), which also serves  
80 as the receptor for SARS-CoV-1 but not for the more distantly related MERS-CoV. Following  
81 ACE2 binding, the membrane-localized host cell serine protease TMPRSS2 cleaves the spike  
82 protein at a specific site, triggering a series of dramatic conformational changes in the S2  
83 subunit, which in turn mediate fusion of the viral and host membranes, enabling viral entry [10].  
84 As well as being a critical determinant of viral tropism, the RBD is a major target for SARS-CoV-  
85 2-neutralizing antibodies, including those identified from convalescent patient peripheral blood  
86 mononuclear cells and those elicited by current (spike-based) vaccines [9,11–18].

87 Compared with those of other RNA viruses, the mutation rate of SARS-CoV-2 is  
88 considered low-moderate ( $6-9 \times 10^{-4}$  bases/genome/year) [19–21], although others have pointed  
89 out that multiple identical mutation hotspot events occurring at different points in time could lead  
90 to an underestimation of the overall mutation rate [22]. Nevertheless, the pandemic has given  
91 rise to a proliferation of variant lineages, including those designated variants of concern (VOCs)  
92 by the World Health Organization (WHO), based on one or more of the following criteria:  
93 increase in transmissibility; increase in virulence; decrease in effectiveness of public health  
94 measures, diagnostics, therapeutics or vaccines ([www.who.int/en/activities/tracking-SARS-CoV-  
95 2-variants](http://www.who.int/en/activities/tracking-SARS-CoV-2-variants)). All of the VOCs carry spike mutations, including one or more that localize to the

96 RBD, motivating efforts to gain a systematic understanding of the effects of RBD amino acid  
97 substitutions on ACE2 binding [23].

98 Here we employ a bacterial two-hybrid (B2H) system [24,25] to study the PPIs of SARS-  
99 CoV-2 in a heterologous non-eukaryotic system. Using this system, we describe a bacteria-  
100 based intraviral interactome. We further demonstrate the utility of the bacterial system for  
101 genetically dissecting the SARS-CoV-2 PPIs by identifying mutations that selectively affect one  
102 or another interaction. In addition, we describe a modified B2H system that allows us to detect  
103 disulfide bond-dependent PPIs in the otherwise reducing *Escherichia coli* cytoplasm. We use  
104 this system to detect the spike RBD-ACE2 interaction and to investigate the effects of mutations  
105 found in VOCs. Our findings set the stage for further investigations of viral PPIs in a convenient  
106 and genetically tractable bacterial system, as well as establishing the feasibility of using our  
107 modified system to detect and dissect disulfide bond-dependent PPIs of other eukaryotic  
108 proteins.

109

## 110 **Results**

### 111 **Bacterial two-hybrid system to detect interactions of SARS-CoV-2 proteome**

112 Previous studies have used yeast two-hybrid (Y2H) systems, a mammalian two-hybrid system  
113 and co-immunoprecipitation experiments (co-IPs) to investigate the SARS-CoV-1 and SARS-  
114 CoV-2 protein interactomes, identifying overlapping but also distinct interactions depending on  
115 the employed system [6,7,26,27]. Compared with bacteria, yeast have a relatively slow growth  
116 rate and are more difficult to culture and transform for labs that do not routinely work with yeast.  
117 To provide a more accessible alternative to Y2H systems as well as the less commonly used  
118 mammalian two-hybrid system, we here describe the successful use of a B2H system  
119 developed in our lab (Fig. 1A) [24,25] to test for viral PPIs. We fused all NCBI-predicted *E. coli*

120 codon-optimized SARS-CoV-2 open reading frames (ORFs; listed in Fig. 1B, see also NCBI  
121 accession #: NC\_045512.2) to the DNA binding protein CI of bacteriophage  $\lambda$  ( $\lambda$ CI) and to the  
122 N-terminal domain of the  $\alpha$  subunit ( $\alpha$ NTD) of RNA polymerase (RNAP). We then tested each  
123 SARS-CoV-2 ORF for interaction with the other SARS-CoV-2 ORFs and itself. Interaction  
124 between two given ORFs (X and Y), fused to  $\alpha$ NTD and  $\lambda$ CI, respectively, stabilizes the binding  
125 of RNAP to the test promoter such that the magnitude of the *lacZ* reporter gene expression  
126 correlates with the strength of the PPI (Fig. 1A).

### 127 **Identification of the SARS-CoV-2 interactome using a B2H system**

128 Using our B2H system, we initially tested each SARS-CoV-2 ORF against each other SARS-  
129 CoV-2 ORF and itself in biological duplicate. Protein pairs with at least a 2-fold activation of *lacZ*  
130 over background in one of the replicates were selected for further analysis. The list of interacting  
131 proteins was further refined by performing repeat experiments with three biological replicates for  
132 each initially identified potential PPI pair. This resulted in a final list of sixteen interacting SARS-  
133 CoV-2 protein pairs, including four self-interactions (Fig. 2). Some of these interactions were  
134 identified only with a specific fusion partner combination (*i.e.*, protein X fused to  $\alpha$ NTD and  
135 protein Y fused to  $\lambda$ CI, or the other way around), while others were fusion partner-independent  
136 (*i.e.*, interaction between proteins X and Y regardless of their fusion to  $\alpha$ NTD or  $\lambda$ CI). Self-  
137 interacting proteins (Nsp7, Nsp9, ORF6 and ORF10) were by definition fusion partner-  
138 insensitive; however, four other pairs of proteins (Nsp7+Nsp8, Nsp10+Nsp14, Nsp10+Nsp16,  
139 Nsp3+N, and Nsp8+ORF6) also interacted detectably regardless of the fusion partner  
140 (Supplementary Fig. 1).

141 Among the identified interacting pairs, several particularly strong PPIs were observed,  
142 including the Nsp7 self-interaction, Nsp7+Nsp8, Nsp10+Nsp16, N+Nsp3 and Nsp9+Nsp11 (Fig.  
143 3). In fact, the Nsp10+Nsp16 pair interacted significantly more strongly than our positive control,

144 representing one of the strongest interactions we have ever measured with our B2H assay. For  
145 our B2H assays, we routinely consider an interaction to be reliable when we detect at least a  
146 two-fold increase in *lacZ* reporter gene expression (measured as  $\beta$ -galactosidase activity) over  
147 the background (obtained with the negative controls). Applying this cut-off to our experimental  
148 data, we identified several medium-to-weak interactions (2- to 5-fold increase over the negative  
149 controls; Supplementary Fig. 2). The interactions of Nsp8+ORF7b and ORF10+ORF10 closely  
150 missed the 2-fold cutoff but were nonetheless included in the list because a previous SARS-  
151 CoV-2 interactome study also identified those interactions (based on co-IP data) [6].

152         Comparison of our SARS-CoV-2 B2H data with the previously reported SARS-CoV-2  
153 Y2H and co-IP data [6] revealed four PPIs that were shared among the three assay systems,  
154 providing strong support for their biological relevance (Supplementary Fig. 3). These included  
155 Nsp7+Nsp8, Nsp8+ORF10, Nsp10+Nsp14 and ORF6+ORF6. Others were identified either in  
156 only one of the assay systems (*i.e.*, B2H, Y2H or co-IP) or in two assay systems (B2H and Y2H,  
157 B2H and co-IP, or Y2H and co-IP) (Supplementary Fig. 3). Furthermore, some of our identified  
158 interactions are validated by co-crystal structures. These included Nsp7+Nsp8 (Protein Data  
159 Bank (PDB) accession number 6YHU [28]), Nsp10+Nsp14 (PDB: 5NFY from SARS-CoV-1 [29]  
160 or more recently 7DIY from SARS-CoV-2 [30]), Nsp10+Nsp16 (PDB: 6W4H [31]) and the Nsp9  
161 self-interaction (PDB: 6W9Q [32]). Notably, no self-interaction of Nsp9 was identified in a  
162 previous Y2H and co-IP analysis of the SARS-CoV-2 interactome [6], highlighting the  
163 importance of employing several different interaction assays when studying the interactome of a  
164 given protein set to avoid loss of information due to experimental system idiosyncrasies.

165         Similar to previous observations for SARS-CoV-1 [7], we identified Nsp8 as a major  
166 SARS-CoV-2 interaction hub, interacting with six other SARS-CoV-2 ORFs (Fig. 3,  
167 Supplementary Fig. 2), consistent with a critical role for Nsp8 in SARS coronavirus biology.  
168 Nonetheless, most of the interaction partners we identified for Nsp8 in SARS-CoV-2 are



169 different than those identified previously for SARS-CoV-1 [7,26,27] (Supplementary Fig. 4).  
170 Overall, only six PPIs were identified in our SARS-CoV-2 B2H analysis and at least one of three  
171 independent SARS-CoV-1 Y2H studies, including two involving Nsp8 (Supplementary Fig. 4).  
172 Notably, there are considerable differences between the results of the three previous Y2H  
173 studies [7,26,27] and only three PPIs (Nsp8+Nsp7, Nsp10+Nsp14, and Nsp10+Nsp16) were  
174 independently identified in two SARS-CoV-1 two-hybrid assays and our SARS-CoV-2 B2H  
175 assay (Supplementary Fig. 4). This could reflect significant differences between the PPI  
176 networks in SARS-CoV-1 and SARS-CoV-2 and/or differences in the assays themselves  
177 (procedures and background organism).

178 **Targeted mutational screens identify interaction partner-specific sites of protein-protein**  
179 **interaction in CoV-2 proteins with more than one interaction partner**

180 As a genetic assay, the B2H system facilitates the dissection of specific PPIs through both  
181 targeted and random mutagenesis. Having established the utility of the B2H assay in testing for  
182 viral PPIs, we next sought to use this assay to dissect the interactions of selected viral proteins  
183 through targeted mutational analysis. Specifically, we chose proteins that interacted with more  
184 than one partner and sought to disrupt the interaction of such a protein with one of its partners  
185 while preserving its interaction with another. We initially selected Nsp10 with two known  
186 interaction partners, Nsp14 and Nsp16, and attempted to disrupt only its interaction with Nsp14.  
187 To identify suitable targets for mutagenesis, we analyzed the crystal structures of Nsp10-Nsp14  
188 (PDB ID: 5NFY [29]) and Nsp10-Nsp16 (PDB ID: 6W4H [31]) and their protein-protein interfaces  
189 using PDBePISA [33]. Based on this approach, we selected three sets of amino acid  
190 substitutions likely to affect the binding of Nsp10 to Nsp14, while leaving its interaction with  
191 Nsp16 intact (assuming that the substitutions do not result in allosteric effects). While the Nsp10  
192 F16A/F19A/V21A set targeted the hydrophobic region, the Nsp10 T5A/T12A/S15A and  
193 S29A/S33A sets partially disrupted the hydrogen bond network of the Nsp10-Nsp14 interface

194 (Fig. 4A,C). Each of the three multiply substituted Nsp10 mutants lost the ability to interact  
195 detectably with Nsp14 while maintaining an approximately wild-type interaction with Nsp16 (Fig.  
196 4B). We note that the close approach of amino acid side chains at a protein-protein interface as  
197 revealed by X-ray crystallography does not necessarily indicate that they participate in a  
198 functionally important interaction. However, the loss of a detectable interaction between each of  
199 the three Nsp10 mutants and Nsp14 in our B2H assay suggests that at least a subset of the  
200 selected residues make stabilizing contacts. Furthermore, although the Nsp10-Nsp16  
201 interaction serves as a control, we also confirmed that the introduced amino acid substitutions  
202 were not generally destabilizing (Supplementary Fig. 5).

203 We then focused on Nsp16 with two interaction partners, Nsp10 and Nsp15, targeting  
204 the Nsp16-Nsp10 pair, which displayed a significantly higher B2H signal than that of the Nsp16-  
205 Nsp15 pair. Here we also utilized the available crystal structure for the Nsp16-Nsp10 complex;  
206 however, as there is no structure for the Nsp16-Nsp15 complex, the substitutions introduced  
207 into Nsp16 were based solely on their predicted effects on its interaction with Nsp10.  
208 Endeavoring to disrupt the Nsp16-Nsp10 interaction, we created two Nsp16 triple substitution  
209 mutants, targeting hydrophobic (I40A/M41A/V44A) or hydrophilic (K76A/Q87A/D106A) contacts,  
210 and a mutant with the six substitutions combined (Fig. 4C). The data reveal drastic effects of  
211 these substitutions on the binding of Nsp16 to Nsp10, resulting in near background or  
212 background levels of reporter gene expression for each of the mutants (Fig. 4D). The effects of  
213 the same substitutions on the binding of Nsp16 to Nsp15 were modest and not statistically  
214 significant. Notably, even though Nsp16 interacts much more weakly with Nsp15 than with  
215 Nsp10, reporter gene expression was lower for each of the Nsp16 mutants in combination with  
216 Nsp10 than when tested in combination with Nsp15 (Fig. 4D). We also confirmed that these  
217 effects are not the result of altered protein levels (Supplementary Fig. 6). Together, these data

218 illustrate a proof-of-principle approach that can be used to obtain functionally informative  
219 mutants within a PPI network.

## 220 **The B2H system as a tool to study circulating spike variants and their binding to ACE2**

221 To further assess whether our B2H system can facilitate the study of emerging mutational  
222 changes in viral populations, we next asked whether we could use our system to study the  
223 interaction between the SARS-CoV-2 spike protein and ACE2. For this, we obtained an *E. coli*  
224 codon-optimized gene fragment encoding the human ACE2 peptidase domain (aa 19-615,  
225 hereafter ACE2). We inserted this gene fragment and a set of gene fragments encoding multiple  
226 domains of the spike protein (including the RBD, aa 331-521) into our two-hybrid vectors, fusing  
227 ACE2 and each of the spike domains to both  $\lambda$ CI and  $\alpha$ NTD. Initial experiments using our  
228 standard *E. coli* B2H strain (FW102 OL2-62 termed B2H; Supplementary Table 1A) failed to  
229 reveal an interaction of ACE2 with any of the selected spike domains (Supplementary Fig. 7;  
230 data not shown). However, previous studies demonstrated that proper disulfide bond formation  
231 is essential in order for spike and ACE2 to engage in a direct interaction [34,35]. Because the *E.*  
232 *coli* cytoplasm is a reducing environment [36], we considered the possibility that the failure to  
233 detect a spike-ACE2 interaction with our standard B2H strain might be due to a lack of proper  
234 disulfide bond formation. To circumvent this obstacle, we modified a commercially available *E.*  
235 *coli* strain (SHuffle from NEB, MA, USA) that permits the efficient expression and formation of  
236 active full-length antibodies in *the E. coli* cytoplasm [37], adapting it for use with our two-hybrid  
237 system (Methods). The SHuffle strain is deleted for two genes that encode cytoplasmic  
238 reductases (*trxB* and *gor*) and also harbors the normally periplasmic disulfide bond isomerase  
239 DsbC in the cytoplasm [38,39]. With this modified oxidizing strain (termed BLS148;  
240 Supplementary Table 1A), we were able to detect an interaction of the spike RBD with ACE2  
241 (Fig. 5A,B). Moreover, this interaction was abrogated when we mutated a pair of cysteine  
242 residues (replacing them individually and in combination with serine residues) that engage in

243 disulfide bond formation within the RBD (C379 and C432) [34], consistent with the surmise that  
244 the oxidizing strain permits detection of the RBD-ACE2 interaction by enabling appropriate  
245 disulfide bond formation and correct folding of the interacting partners (Fig. 5B; Supplementary  
246 Fig. 8).

247 Having adapted our B2H system for the study of disulfide bond-dependent PPIs, we  
248 sought to test different spike (RBD) circulating variants for their abilities to bind ACE2. The RBD  
249 amino acid substitutions included in our study are found in several SARS-CoV-2 variants that  
250 were previously designated VOCs by the Centers for Disease Control and Prevention (USA;  
251 <https://www.cdc.gov/coronavirus/2019-ncov/variants/variant-info.html>, initially accessed  
252 05/30/2021). Specifically, we included the Alpha variant (B.1.1.7, first identified in the United  
253 Kingdom) that carries the RBD N501Y substitution, the Beta variant (B.1.351, first identified in  
254 South Africa) that carries the RBD K417N, E484K and N501Y substitutions, as well as the  
255 Epsilon variant (B.1.429, first identified in California) that carries the RBD L452R substitution,  
256 introducing the corresponding mutations into the spike RBD on our B2H vector (Fig. 5D). The  
257 latter two variants have recently gained more attention as they are considered immune escape  
258 variants, potentially resulting in a partial loss of immunity in previously infected or immunized  
259 people [40–47]. In contrast, the Alpha variant is not characterized by a marked escape from  
260 antibody neutralization [41,42,45–47]. Factors that are believed to contribute, potentially, to  
261 immune escape include changes in the spike protein that: (i) enhance or stabilize its binding to  
262 ACE2 or (ii) decrease the binding of specific anti-spike neutralizing antibodies [48–50].

263 As well as testing the Alpha, Beta and Epsilon RBDs for their abilities to bind ACE2, we  
264 included RBD mutants bearing component single and double substitutions from the Beta variant  
265 (Fig. 5C; Supplementary Fig. 9). We found that the N501Y substitution (in the context of the  
266 Alpha variant) had no observable effect on ACE2 binding. In contrast, the L452R substitution  
267 (Epsilon variant) resulted in a statistically significant increase in ACE2 binding. Substitutions

268 K417N, E484K and N501Y (Beta variant) together resulted in a significant reduction in ACE2  
269 binding, as did the individual component substitutions K417N and E484K (with the E484K  
270 substitution having the stronger effect). However, the effects of these two substitutions were  
271 partially (E484K) or fully (K417N) abrogated when combined with the N501Y substitution. The  
272 binding of the triply substituted variant was indistinguishable from that of the E484K/N501Y  
273 double mutant, indicating that in this context the K417N substitution neither weakens or  
274 strengthens the interaction. Together, these findings indicate that our modified B2H system  
275 enables detection of disulfide bond-dependent PPIs and can be used to investigate the effects  
276 of RBD variant substitutions on the RBD-ACE2 interaction.

277

## 278 **Discussion**

### 279 **Use of bacteria-based assay to investigate SARS-CoV-2 interactome**

280 Here we use a versatile bacteria-based genetic tool for detecting and dissecting PPIs  
281 [24,25] to screen the SARS-CoV-2 proteome for intraviral PPIs. We detected a total of sixteen  
282 PPIs, including four self-interactions. Nine of these interactions were also detected in a previous  
283 SARS-CoV-2 PPI study (Supplementary Fig. 3), as assessed by Y2H-based screens and/or  
284 mammalian cell-based co-IP experiments [6]. Additionally, four of the interactions we detected  
285 have been captured in co-crystal structures, including the Nsp9 self-interaction (PDB: 6W9Q;  
286 [32]), which was not identified by either Y2H or co-IP analyses [6]. Of the six interactions we  
287 detected that were not previously described in the context of SARS-CoV-2, three were  
288 previously detected by Y2H analyses in the context of SARS CoV-1 (Supplementary Fig. 4). Of  
289 the remaining three interactions, not previously described, two (Nsp9+Nsp11 and Nsp3+N) were  
290 particularly strong as assessed in our B2H assay (Fig. 3).

291           Although the different assays that have been used to characterize the SARS-CoV-2  
292 interactome have provided results that often corroborate one another, there are many examples  
293 of interactions that have been detected with only one of the assays. These discrepancies  
294 highlight the importance of employing multiple assay systems, each with its own inherent  
295 limitations, to maximize the likelihood of obtaining a complete picture. Because of its  
296 experimental accessibility, we expect that our B2H assay will be useful in evaluating other viral  
297 proteomes, particularly by taking advantage of our oxidizing reporter strain that better  
298 approximates the eukaryotic cell environment in allowing for proper disulfide bond formation in  
299 the *E. coli* cytoplasm [51,52]. To further extend the spectrum of testable viral and eukaryotic  
300 PPIs, the system could be augmented to enable the detection of phosphorylation-dependent  
301 PPIs by introducing specific mammalian kinases into our reporter strain [53]. Given that many  
302 mammalian (and presumably viral) proteins are constitutively phosphorylated in yeast [54–56], a  
303 lack of properly phosphorylated proteins in our B2H system could explain, at least in principle,  
304 why some SARS-CoV-2 PPIs were identified only in the Y2H screens [6] and not in our system  
305 (Supplementary Fig. 3). We note, however, that a comprehensive phosphoproteomics analysis  
306 of SARS-CoV-2-infected cells [57] suggests that other than interactions involving the N protein,  
307 which was found to be phosphorylated at multiple sites, most of the viral PPIs that were  
308 detected by Y2H analysis but not in our B2H system involve proteins that were not detectably  
309 phosphorylated.

### 310 **Genetic dissection of specific SARS-CoV-2 PPIs**

311           A benefit of two-hybrid approaches for studying PPIs is that detected interactions can be  
312 readily dissected genetically, something that is particularly straightforward to do with our B2H  
313 system. As a proof-of-principle, we used a structure-based approach to investigate the effects of  
314 targeted mutations on specific SARS-CoV-2 PPIs, identifying substitutions that disrupt one  
315 interaction but not another. In addition to facilitating the evaluation of specific circulating or

316 targeted mutations, our B2H system can readily be adapted to screen for randomly generated  
317 mutations that selectively affect one PPI and not another [58] when there is insufficient  
318 information to make informed predictions from structural or other data. The identification of such  
319 mutations could facilitate the functional analysis of particular PPIs and inform the choice of  
320 potential drug targets for small molecule drug design. Furthermore, with a suitably modified  
321 reporter strain to improve compound accessibility [59], compound or peptide libraries could be  
322 screened to identify candidates that might target specific SARS-CoV-2 PPIs. It should also be  
323 feasible to adapt our B2H reporter system for an *in vitro* cell-free protein expression system,  
324 thereby facilitating compound screenings.

### 325 **Use of oxidizing B2H reporter strain enables detection of RBD-ACE2 interaction**

326         Based on previous studies, we anticipated a high-affinity interaction between the spike  
327 RBD and ACE2 [9,23,34]. With our modified bacteria-based system, we found that the RBD-  
328 ACE2 interaction resulted in a roughly 3-fold increase in *lacZ* reporter gene expression over  
329 background, a relatively modest effect. One possible explanation is that the  $\lambda$ CI-ACE2 fusion  
330 protein is produced at relatively low levels compared with unfused  $\lambda$ CI and other  $\lambda$ CI fusion  
331 proteins we have studied in the past (Supplementary Fig. 8), perhaps resulting in intracellular  
332 concentrations insufficient to saturate the DNA-binding site on our *lacZ* reporter. Another  
333 possible explanation (not mutually exclusive) lies in the fact that both the SARS-CoV-2 spike  
334 protein and ACE2 are glycosylated in mammalian cells [9,60], with some studies suggesting that  
335 glycan-side chain interactions may be important in stabilizing the RBD-ACE2 interaction [61,62].  
336 Thus, the interaction detected in our B2H system could be compromised by the lack of  
337 mammalian-like N- and O-glycosylation in *E. coli* [63].

338         Our B2H system enabled us to assess the effects of specific RBD amino acid  
339 substitutions that have been identified in globally circulating SARS-CoV-2 variants. We focused

340 specifically on three VOCs, as designated by the CDC at the time we initiated our study: the  
341 Alpha variant (B.1.1.7), the Beta variant (B.1.351) and the Epsilon variant (B.1.429), carrying  
342 RBD substitutions N501Y, N501Y/K417N/E484K, and L452R, respectively (see Fig. 5D) [41].  
343 We note that as of September 21, 2021 each of these variants has been deescalated from a  
344 VOC to a variant being monitored (VBM) by the CDC. We also note that the highly contagious  
345 and rapidly proliferating Delta variant, currently designated as a VOC, harbors the L452R  
346 substitution in the RBD, together with a second substitution (T478K) [64].

347 Mutated in both the Alpha and the Beta variants, residue N501 is localized at the binding  
348 interface with ACE2 [34,65] and many reports have suggested that the N501Y substitution  
349 increases the affinity of the RBD for ACE2 [23,48,66–70] (but see [71] for a discrepant  
350 prediction), potentially explaining the elevated infectivity of the Alpha variant. In a study in which  
351 the effects of all possible RBD amino acid substitutions were examined using a yeast-surface-  
352 display platform, Starr *et al.* identified N501Y as one of the substitutions causing the highest  
353 gain in ACE2-binding affinity [23]. In contrast, our B2H assay did not reveal any significant effect  
354 of the N501Y substitution on the strength of the RBD-ACE2 interaction. Possibly this  
355 discrepancy is due to the lack of glycosylation in the bacterial system; in fact, an ACE2 glycan  
356 (N322) that has been reported to enhance RBD-ACE2 binding is part of the same binding patch  
357 that includes N501 [62]. Nonetheless, we did observe a binding enhancing, compensatory effect  
358 of the N501Y substitution when tested in the context of the Beta variant. That is, we found that  
359 Beta-associated substitutions K417N and E484K both reduced ACE2 binding when tested  
360 individually, and that the N501Y substitution compensated for these effects, partially in the case  
361 of E484K and fully in the case of K417N. Our results thus suggest that substitutions K417N and  
362 E484K, which have been implicated in significant immune escape [43–45,72–74], may impose a  
363 cost on ACE2 binding that is compensated by the N501Y substitution (see also [70]). Consistent  
364 with our findings, the K417N substitution has been previously reported to weaken ACE2 binding



365 [72,75,76]; however, in contrast with our results, Starr *et al.* [23] found that the E484K  
366 substitution had a small positive effect on ACE2 binding.

367 In the case of the L452R substitution, which is present in the Epsilon variant and also in  
368 the Delta variant [64], we observed a modest enhancement of ACE2 binding. Residue L452 is  
369 positioned at the edge of the binding interface with ACE2 and although this residue does not  
370 make direct contact with ACE2 [34,77], evidence suggests that substitution L452R enhances  
371 viral infectivity significantly [77,78]. Furthermore, it has been suggested that the L452R mutation  
372 is responsible for the dramatic clonal expansion of lineages carrying this mutation [79], possibly  
373 due to a decrease in the potency of antibody neutralization or through other immune escape  
374 characteristics [44,46,64,77,78,80]. Whether or not an effect of the L452R substitution on ACE2  
375 binding, apparently modest, is a contributing factor in the rapid spread of variants carrying this  
376 mutation remains to be determined.

## 377 **Summary**

378 Taken together, our results illustrate the utility of a B2H system as an accessible and  
379 economical genetic tool to complement other methods for studying viral PPIs. To the best of our  
380 knowledge, we provide the first bacteria-based viral interactome, describing sixteen different  
381 intraviral PPIs from SARS-CoV-2. As a non-eukaryotic system, the B2H assay is unlikely to  
382 contain bridging factors that can complicate the interpretation of positive results. At the same  
383 time, the bacterial system lacks the machinery for enabling potentially relevant post-translational  
384 modifications such as protein phosphorylation (which could however be engineered into the  
385 system; [53]) and protein glycosylation. Although generally a limitation, the lack of protein  
386 glycosylation could in certain situations be informative, enabling a comparison between systems  
387 that do and do not support this modification. The new oxidizing B2H reporter strain that we  
388 describe enabled us to detect the SARS-CoV-2 spike RBD-ACE2 interaction and characterize

389 the effects of several RBD substitutions present in circulating variants. This strain provides a  
390 means to test newly arising coronavirus lineages for binding to ACE2 or other human cell  
391 surface receptors in the future, as well as extending the reach of the B2H system to include  
392 disulfide bond-dependent PPIs in general.

393 **References**

- 394 1 Zhou P, Yang X Lou, Wang XG, Hu B, Zhang L, Zhang W, Si HR, Zhu Y, Li B, Huang CL,  
395 Chen HD, Chen J, Luo Y, Guo H, Jiang R Di, Liu MQ, Chen Y, Shen XR, Wang X, Zheng  
396 XS, Zhao K, Chen QJ, Deng F, Liu LL, Yan B, Zhan FX, Wang YY, Xiao GF & Shi ZL  
397 (2020) A pneumonia outbreak associated with a new coronavirus of probable bat origin.  
398 *Nature* **579**, 270–273.
- 399 2 Hu B, Guo H, Zhou P & Shi ZL (2021) Characteristics of SARS-CoV-2 and COVID-19. *Nat*  
400 *Rev Microbiol* **19**, 141–154.
- 401 3 V'kovski P, Kratzel A, Steiner S, Stalder H & Thiel V (2021) Coronavirus biology and  
402 replication: implications for SARS-CoV-2. *Nat Rev Microbiol* **19**, 155–170.
- 403 4 Park A & Iwasaki A (2020) Type I and Type III Interferons – Induction, Signaling, Evasion, and  
404 Application to Combat COVID-19. *Cell Host Microbe* **27**, 870–878.
- 405 5 Wu F, Zhao S, Yu B, Chen YM, Wang W, Song ZG, Hu Y, Tao ZW, Tian JH, Pei YY, Yuan  
406 ML, Zhang YL, Dai FH, Liu Y, Wang QM, Zheng JJ, Xu L, Holmes EC & Zhang YZ (2020)  
407 A new coronavirus associated with human respiratory disease in China. *Nature* **579**, 265–  
408 269.
- 409 6 Li J, Guo M, Tian X, Wang X, Yang X, Wu P, Liu C, Xiao Z, Qu Y, Yin Y, Wang C, Zhang Y,  
410 Zhu Z, Liu Z, Peng C, Zhu T & Liang Q (2021) Virus-Host Interactome and Proteomic  
411 Survey Reveal Potential Virulence Factors Influencing SARS-CoV-2 Pathogenesis. *Med* **2**,  
412 99-112.e7.
- 413 7 von Brunn A, Teepe C, Simpson JC, Pepperkok R, Friedel CC, Zimmer R, Roberts R, Baric R  
414 & Haas J (2007) Analysis of intraviral protein-protein interactions of the SARS coronavirus  
415 ORFeome. *PLoS One* **2**, e459.
- 416 8 Wrapp D, Wang N, Corbett KS, Goldsmith JA, Hsieh CL, Abiona O, Graham BS & McLellan  
417 JS (2020) Cryo-EM structure of the 2019-nCoV spike in the prefusion conformation.  
418 *Science* **367**, 1260–1263.
- 419 9 Walls AC, Park YJ, Tortorici MA, Wall A, McGuire AT & Velesler D (2020) Structure, Function,  
420 and Antigenicity of the SARS-CoV-2 Spike Glycoprotein. *Cell* **181**, 281-292.e6.
- 421 10 Hoffmann M, Kleine-Weber H, Schroeder S, Krüger N, Herrler T, Erichsen S, Schiergens TS,  
422 Herrler G, Wu NH, Nitsche A, Müller MA, Drosten C & Pöhlmann S (2020) SARS-CoV-2  
423 Cell Entry Depends on ACE2 and TMPRSS2 and Is Blocked by a Clinically Proven  
424 Protease Inhibitor. *Cell* **181**, 271-280.e8.
- 425 11 Premkumar L, Segovia-Chumbez B, Jadi R, Martinez DR, Raut R, Markmann AJ, Cornaby  
426 C, Bartelt L, Weiss S, Park Y, Edwards CE, Weimer E, Scherer EM, Rouphael N,  
427 Edupuganti S, Weiskopf D, Tse L V., Hou YJ, Margolis D, Sette A, Collins MH, Schmitz J,  
428 Baric RS & de Silva AM (2020) The receptor-binding domain of the viral spike protein is an  
429 immunodominant and highly specific target of antibodies in SARS-CoV-2 patients. *Sci*  
430 *Immunol* **5**, 1–15.
- 431 12 Barnes CO, Jette CA, Abernathy ME, Dam K-MA, Esswein SR, Gristick HB, Malyutin AG,  
432 Sharaf NG, Huey-Tubman KE, Lee YE, Robbiani DF, Nussenzweig MC, West AP &

- 433 Bjorkman PJ (2020) SARS-CoV-2 neutralizing antibody structures inform therapeutic  
434 strategies. *Nature* **588**, 682–687.
- 435 13 Liu L, Wang P, Nair MS, Yu J, Rapp M, Wang Q, Luo Y, Chan JFW, Sahi V, Figueroa A, Guo  
436 X V., Cerutti G, Bimela J, Gorman J, Zhou T, Chen Z, Yuen KY, Kwong PD, Sodroski JG,  
437 Yin MT, Sheng Z, Huang Y, Shapiro L & Ho DD (2020) Potent neutralizing antibodies  
438 against multiple epitopes on SARS-CoV-2 spike. *Nature* **584**, 450–456.
- 439 14 Barnes CO, West AP, Huey-Tubman KE, Hoffmann MAG, Sharaf NG, Hoffman PR, Koranda  
440 N, Gristick HB, Gaebler C, Muecksch F, Cetrulo Lorenzi JC, Finkin S, Hägglöf T, Hurley A,  
441 Millard KG, Weisblum Y, Schmidt F, Hatzioannou T, Bieniasz PD, Caskey M, Robbiani DF,  
442 Nussenzweig MC & Bjorkman PJ (2020) Structures of human antibodies bound to SARS-  
443 CoV-2 spike reveal common epitopes and recurrent features of antibodies. *Cell* **182**, 828-  
444 842.e16.
- 445 15 Pinto D, Park YJ, Beltramello M, Walls AC, Tortorici MA, Bianchi S, Jaconi S, Culap K, Zatta  
446 F, De Marco A, Peter A, Guarino B, Spreafico R, Camerini E, Case JB, Chen RE,  
447 Havenar-Daughton C, Snell G, Telenti A, Virgin HW, Lanzavecchia A, Diamond MS, Fink  
448 K, Velesler D & Corti D (2020) Cross-neutralization of SARS-CoV-2 by a human  
449 monoclonal SARS-CoV antibody. *Nature* **583**, 290–295.
- 450 16 Robbiani DF, Gaebler C, Muecksch F, Lorenzi JCC, Wang Z, Cho A, Agudelo M, Barnes  
451 CO, Gazumyan A, Finkin S, Hägglöf T, Oliveira TY, Viant C, Hurley A, Hoffmann HH,  
452 Millard KG, Kost RG, Cipolla M, Gordon K, Bianchini F, Chen ST, Ramos V, Patel R, Dizon  
453 J, Shimeliovich I, Mendoza P, Hartweg H, Nogueira L, Pack M, Horowitz J, Schmidt F,  
454 Weisblum Y, Michailidis E, Ashbrook AW, Waltari E, Pak JE, Huey-Tubman KE, Koranda  
455 N, Hoffman PR, West AP, Rice CM, Hatzioannou T, Bjorkman PJ, Bieniasz PD, Caskey M  
456 & Nussenzweig MC (2020) Convergent antibody responses to SARS-CoV-2 in  
457 convalescent individuals. *Nature* **584**, 437–442.
- 458 17 Zost SJ, Gilchuk P, Case JB, Binshtein E, Chen RE, Nkolola JP, Schäfer A, Reidy JX,  
459 Trivette A, Nargi RS, Sutton RE, Suryadevara N, Martinez DR, Williamson LE, Chen EC,  
460 Jones T, Day S, Myers L, Hassan AO, Kafai NM, Winkler ES, Fox JM, Shrihari S, Mueller  
461 BK, Meiler J, Chandrashekar A, Mercado NB, Steinhardt JJ, Ren K, Loo Y-M, Kallewaard  
462 NL, McCune BT, Keeler SP, Holtzman MJ, Barouch DH, Galinski LE, Baric RS, Thackray  
463 LB, Diamond MS, Carnahan RH & Crowe JE (2020) Potently neutralizing and protective  
464 human antibodies against SARS-CoV-2. *Nature* **584**, 443–449.
- 465 18 Rogers TF, Zhao F, Huang D, Beutler N, Burns A, He W, Limbo O, Smith C, Song G, Woehl  
466 J, Yang L, Abbott RK, Callaghan S, Garcia E, Hurtado J, Parren M, Peng L, Ramirez S,  
467 Ricketts J, Ricciardi MJ, Rawlings SA, Wu NC, Yuan M, Smith DM, Nemazee D, Teijaro  
468 JR, Voss JE, Wilson IA, Andrabi R, Briney B, Landais E, Sok D, Jardine JG & Burton DR  
469 (2020) Isolation of potent SARS-CoV-2 neutralizing antibodies and protection from disease  
470 in a small animal model. *Science* **369**, 956–963.
- 471 19 van Dorp L, Acman M, Richard D, Shaw LP, Ford CE, Ormond L, Owen CJ, Pang J, Tan  
472 CCS, Boshier FAT, Ortiz AT & Balloux F (2020) Emergence of genomic diversity and  
473 recurrent mutations in SARS-CoV-2. *Infect Genet Evol* **83**, 104351.
- 474 20 Singh D & Yi S V (2021) On the origin and evolution of SARS-CoV-2. *Exp Mol Med* **53**, 537–  
475 547.
- 476 21 van Dorp L, Richard D, Tan CCS, Shaw LP, Acman M & Balloux F (2020) No evidence for

- 477 increased transmissibility from recurrent mutations in SARS-CoV-2. *Nat Commun* **11**,  
478 5986.
- 479 22 De Maio N, Walker CR, Turakhia Y, Lanfear R, Corbett-Detig R & Goldman N (2021)  
480 Mutation Rates and Selection on Synonymous Mutations in SARS-CoV-2. *Genome Biol*  
481 *Evol* **13**, 1–14.
- 482 23 Starr TN, Greaney AJ, Hilton SK, Ellis D, Crawford KHD, Dingens AS, Navarro MJ, Bowen  
483 JE, Tortorici MA, Walls AC, King NP, Velesler D & Bloom JD (2020) Deep Mutational  
484 Scanning of SARS-CoV-2 Receptor Binding Domain Reveals Constraints on Folding and  
485 ACE2 Binding. *Cell* **182**, 1295-1310.e20.
- 486 24 Dove SL & Hochschild A (2004) A Bacterial Two-Hybrid System Based on Transcription  
487 Activation. In *Protein-Protein Interactions. Methods and Applications* (Fu H, ed), pp. 231–  
488 246. Humana Press, Totowa, NJ.
- 489 25 Dove SL, Joung JK & Hochschild A (1997) Activation of prokaryotic transcription through  
490 arbitrary protein–protein contacts. *Nature* **386**, 627–630.
- 491 26 Pan J, Peng X, Gao Y, Li Z, Lu X, Chen Y, Ishaq M, Liu D, DeDiego ML, Enjuanes L & Guo  
492 D (2008) Genome-wide analysis of protein-protein interactions and involvement of viral  
493 proteins in SARS-CoV replication. *PLoS One* **3**, e3299.
- 494 27 Imbert I, Snijder EJ, Dimitrova M, Guillemot JC, Lécine P & Canard B (2008) The SARS-  
495 Coronavirus PLnc domain of nsp3 as a replication/transcription scaffolding protein. *Virus*  
496 *Res* **133**, 136–148.
- 497 28 Konkolova E, Klima M, Nencka R & Boura E (2020) Structural analysis of the putative SARS-  
498 CoV-2 primase complex. *J Struct Biol* **211**, 107548.
- 499 29 Ferron F, Subissi L, Silveira De Moraes AT, Le NTT, Sevajol M, Gluais L, Decroly E,  
500 Vonrhein C, Bricogne G, Canard B & Imbert I (2018) Structural and molecular basis of  
501 mismatch correction and ribavirin excision from coronavirus RNA. *Proc Natl Acad Sci* **115**,  
502 E162–E171.
- 503 30 Lin S, Chen H, Chen Z, Yang F, Ye F, Zheng Y, Yang J, Lin X, Sun H, Wang L, Wen A,  
504 Dong H, Xiao Q, Deng D, Cao Y & Lu G (2021) Crystal structure of SARS-CoV-2 nsp10  
505 bound to nsp14-ExoN domain reveals an exoribonuclease with both structural and  
506 functional integrity. *Nucleic Acids Res* **49**, 5382–5392.
- 507 31 Rosas-Lemus M, Minasov G, Shuvalova L, Inniss NL, Kiryukhina O, Brunzelle J & Satchell  
508 KJF (2020) High-resolution structures of the SARS-CoV-2 2'-O-methyltransferase reveal  
509 strategies for structure-based inhibitor design. *Sci Signal* **13**, eabe1202.
- 510 32 Littler DR, Gully BS, Colson RN & Rossjohn J (2020) Crystal structure of the SARS-CoV-2  
511 non-structural protein 9, Nsp9. *iScience* **23**, 101258.
- 512 33 Krissinel E & Henrick K (2007) Inference of Macromolecular Assemblies from Crystalline  
513 State. *J Mol Biol* **372**, 774–797.
- 514 34 Lan J, Ge J, Yu J, Shan S, Zhou H, Fan S, Zhang Q, Shi X, Wang Q, Zhang L & Wang X  
515 (2020) Structure of the SARS-CoV-2 spike receptor-binding domain bound to the ACE2  
516 receptor. *Nature* **581**, 215–220.

- 517 35 Hati S & Bhattacharyya S (2020) Impact of Thiol-Disulfide Balance on the Binding of Covid-  
518 19 Spike Protein with Angiotensin-Converting Enzyme 2 Receptor. *ACS Omega* **5**, 16292–  
519 16298.
- 520 36 Stewart EJ, Åslund F & Beckwith J (1998) Disulfide bond formation in the Escherichia coli  
521 cytoplasm: An in vivo role reversal for the thioredoxins. *EMBO J* **17**, 5543–5550.
- 522 37 Robinson MP, Ke N, Lobstein J, Peterson C, Szkodny A, Mansell TJ, Tuckey C, Riggs PD,  
523 Colussi PA, Noren CJ, Taron CH, Delisa MP & Berkmen M (2015) Efficient expression of  
524 full-length antibodies in the cytoplasm of engineered bacteria. *Nat Commun* **6**, 8072.
- 525 38 Bessette PH, Åslund F, Beckwith J & Georgiou G (1999) Efficient folding of proteins with  
526 multiple disulfide bonds in the Escherichia coli cytoplasm. *Proc Natl Acad Sci U S A* **96**,  
527 13703–13708.
- 528 39 Lobstein J, Emrich CA, Jeans C, Faulkner M, Riggs P & Berkmen M (2012) SHuffle, a novel  
529 Escherichia coli protein expression strain capable of correctly folding disulfide bonded  
530 proteins in its cytoplasm. *Microb Cell Fact* **11**, 753.
- 531 40 Stamatatos L, Czartoski J, Wan Y-H, Homad LJ, Rubin V, Glantz H, Neradilek M, Seydoux  
532 E, Jennewein MF, MacCamy AJ, Feng J, Mize G, De Rosa SC, Finzi A, Lemos MP, Cohen  
533 KW, Moodie Z, McElrath MJ & McGuire AT (2021) mRNA vaccination boosts cross-variant  
534 neutralizing antibodies elicited by SARS-CoV-2 infection. *Science* **372**, 1413–1418.
- 535 41 Starr TN, Greaney AJ, Dingens AS & Bloom JD (2021) Complete map of SARS-CoV-2 RBD  
536 mutations that escape the monoclonal antibody LY-CoV555 and its cocktail with LY-  
537 CoV016. *Cell Reports Med* **2**, 100255.
- 538 42 Planas D, Bruel T, Grzelak L, Guivel-Benhassine F, Staropoli I, Porrot F, Planchais C,  
539 Buchrieser J, Rajah MM, Bishop E, Albert M, Donati F, Prot M, Behillil S, Enouf V, Maquart  
540 M, Smati-Lafarge M, Varon E, Schortgen F, Yahyaoui L, Gonzalez M, De Sèze J, Péré H,  
541 Veyer D, Sève A, Simon-Lorière E, Fafi-Kremer S, Stefic K, Mouquet H, Hocqueloux L, van  
542 der Werf S, Prazuck T & Schwartz O (2021) Sensitivity of infectious SARS-CoV-2 B.1.1.7  
543 and B.1.351 variants to neutralizing antibodies. *Nat Med* **27**, 917–924.
- 544 43 Liu Z, VanBlargan LA, Bloyet LM, Rothlauf PW, Chen RE, Stumpf S, Zhao H, Errico JM,  
545 Theel ES, Liebeskind MJ, Alford B, Buchser WJ, Ellebedy AH, Fremont DH, Diamond MS  
546 & Whelan SPJ (2021) Identification of SARS-CoV-2 spike mutations that attenuate  
547 monoclonal and serum antibody neutralization. *Cell Host Microbe* **29**, 477-488.e4.
- 548 44 Greaney AJ, Starr TN, Barnes CO, Weisblum Y, Schmidt F, Caskey M, Gaebler C, Cho A,  
549 Agudelo M, Finkin S, Wang Z, Poston D, Muecksch F, Hatziioannou T, Bieniasz PD,  
550 Robbiani DF, Nussenzweig MC, Bjorkman PJ & Bloom JD (2021) Mapping mutations to the  
551 SARS-CoV-2 RBD that escape binding by different classes of antibodies. *Nat Commun* **12**,  
552 4196.
- 553 45 Wang P, Nair MS, Liu L, Iketani S, Luo Y, Guo Y, Wang M, Yu J, Zhang B, Kwong PD,  
554 Graham BS, Mascola JR, Chang JY, Yin MT, Sobieszczyk M, Kyratsous CA, Shapiro L,  
555 Sheng Z, Huang Y & Ho DD (2021) Antibody resistance of SARS-CoV-2 variants B.1.351  
556 and B.1.1.7. *Nature* **593**, 130–135.
- 557 46 McCallum M, Bassi J, Marco A De, Chen A, Walls AC, Iulio J Di, Tortorici MA, Navarro M-J,  
558 Silacci-Fregni C, Saliba C, Agostini M, Pinto D, Culap K, Bianchi S, Jaconi S, Cameroni E,

- 559 Bowen JE, Tilles SW, Pizzuto MS, Guastalla SB, Bona G, Pellanda AF, Garzoni C, Van  
560 Voorhis WC, Rosen LE, Snell G, Telenti A, Virgin HW, Piccoli L, Corti D & Veessler D  
561 (2021) SARS-CoV-2 immune evasion by variant B.1.427/B.1.429. *Science* **373**, 648–654.
- 562 47 Garcia-Beltran WF, Lam EC, St. Denis K, Nitido AD, Garcia ZH, Hauser BM, Feldman J,  
563 Pavlovic MN, Gregory DJ, Poznansky MC, Sigal A, Schmidt AG, Iafrate AJ, Naranbhai V &  
564 Balazs AB (2021) Multiple SARS-CoV-2 variants escape neutralization by vaccine-induced  
565 humoral immunity. *Cell* **184**, 2372-2383.e9.
- 566 48 Clark SA, Clark LE, Pan J, Coscia A, McKay LGA, Shankar S, Johnson RI, Brusic V,  
567 Choudhary MC, Regan J, Li JZ, Griffiths A & Abraham J (2021) SARS-CoV-2 evolution in  
568 an immunocompromised host reveals shared neutralization escape mechanisms. *Cell* **184**,  
569 2605-2617.e18.
- 570 49 Choi B, Choudhary MC, Regan J, Sparks JA, Padera RF, Qiu X, Solomon IH, Kuo H-H,  
571 Boucau J, Bowman K, Adhikari U Das, Winkler ML, Mueller AA, Hsu TY-T, Desjardins M,  
572 Baden LR, Chan BT, Walker BD, Lichterfeld M, Brigl M, Kwon DS, Kanjilal S, Richardson  
573 ET, Jonsson AH, Alter G, Barczak AK, Hanage WP, Yu XG, Gaiha GD, Seaman MS,  
574 Cernadas M & Li JZ (2020) Persistence and Evolution of SARS-CoV-2 in an  
575 Immunocompromised Host. *N Engl J Med* **383**, 2291–2293.
- 576 50 Starr TN, Greaney AJ, Addetia A, Hannon WW, Choudhary MC, Dingens AS, Li JZ & Bloom  
577 JD (2021) Prospective mapping of viral mutations that escape antibodies used to treat  
578 COVID-19. *Science* **371**, 850–854.
- 579 51 Berkmen M (2012) Production of disulfide-bonded proteins in *Escherichia coli*. *Protein Expr*  
580 *Purif* **82**, 240–251.
- 581 52 Ren G, Ke N & Berkmen M (2016) Use of the SHuffle strains in production of proteins. *Curr*  
582 *Protoc Protein Sci* **2016**, 5.26.1-5.26.21.
- 583 53 Shaywitz AJ, Dove SL, Kornhauser JM, Hochschild A & Greenberg ME (2000) Magnitude of  
584 the CREB-Dependent Transcriptional Response Is Determined by the Strength of the  
585 Interaction between the Kinase-Inducible Domain of CREB and the KIX Domain of CREB-  
586 Binding Protein. *Mol Cell Biol* **20**, 9409–9422.
- 587 54 Ptacek J, Devgan G, Michaud G, Zhu H, Zhu X, Fasolo J, Guo H, Jona G, Breitreutz A,  
588 Sopko R, McCartney RR, Schmidt MC, Rachidi N, Lee SJ, Mah AS, Meng L, Stark MJR,  
589 Stern DF, De Virgilio C, Tyers M, Andrews B, Gerstein M, Schweitzer B, Predki PF &  
590 Snyder M (2005) Global analysis of protein phosphorylation in yeast. *Nature* **438**, 679–684.
- 591 55 Errede B & Levin DE (1993) A conserved kinase cascade for MAP kinase activation in yeast.  
592 *Curr Opin Cell Biol* **5**, 254–260.
- 593 56 Hanks SK, Quinn AM & Hunter T (1988) The protein kinase family: conserved features and  
594 deduced phylogeny of the catalytic domains. *Science* **241**, 42–52.
- 595 57 Bouhaddou M, Memon D, Meyer B, White KM, Rezelj V V., Correa Marrero M, Polacco BJ,  
596 Melnyk JE, Ulferts S, Kaake RM, Batra J, Richards AL, Stevenson E, Gordon DE, Rojic A,  
597 Obernier K, Fabius JM, Soucheray M, Miorin L, Moreno E, Koh C, Tran QD, Hardy A,  
598 Robinot R, Vallet T, Nilsson-Payant BE, Hernandez-Armenta C, Dunham A, Weigang S,  
599 Knerr J, Modak M, Quintero D, Zhou Y, Dugourd A, Valdeolivas A, Patil T, Li Q, Hüttenhain  
600 R, Cakir M, Muralidharan M, Kim M, Jang G, Tutuncuoglu B, Hiatt J, Guo JZ, Xu J,

- 601 Bouhaddou S, Mathy CJP, Gaulton A, Manners EJ, Félix E, Shi Y, Goff M, Lim JK, McBride  
602 T, O'Neal MC, Cai Y, Chang JCJ, Broadhurst DJ, Klippsten S, De wit E, Leach AR,  
603 Kortemme T, Shoichet B, Ott M, Saez-Rodriguez J, tenOever BR, Mullins RD, Fischer ER,  
604 Kochs G, Grosse R, García-Sastre A, Vignuzzi M, Johnson JR, Shokat KM, Swaney DL,  
605 Beltrao P & Krogan NJ (2020) The Global Phosphorylation Landscape of SARS-CoV-2  
606 Infection. *Cell* **182**, 685-712.e19.
- 607 58 Heller DM, Tavag M & Hochschild A (2017) *CbtA toxin of Escherichia coli inhibits cell division*  
608 *and cell elongation via direct and independent interactions with FtsZ and MreB*. *PLoS Gen*  
609 **13**, 1-38.
- 610 59 Althoff EA & Cornish VW (2002) A Bacterial Small-Molecule Three-Hybrid System. *Angew*  
611 *Chemie Int Ed* **41**, 2327–2330.
- 612 60 Zhao P, Praissman JL, Grant OC, Cai Y, Xiao T, Rosenbalm KE, Aoki K, Kellman BP,  
613 Bridger R, Barouch DH, Brindley MA, Lewis NE, Tiemeyer M, Chen B, Woods RJ & Wells L  
614 (2020) Virus-Receptor Interactions of Glycosylated SARS-CoV-2 Spike and Human ACE2  
615 Receptor. *Cell Host Microbe* **28**, 586-601.e6.
- 616 61 Acharya A, Lynch DL, Pavlova A, Pang YT & Gumbart JC (2021) ACE2 glycans  
617 preferentially interact with SARS-CoV-2 over SARS-CoV. *Chem Commun* **57**, 5949–5952.
- 618 62 Mehdipour AR & Hummer G (2021) Dual nature of human ACE2 glycosylation in binding to  
619 SARS-CoV-2 spike. *Proc Natl Acad Sci U S A* **118**, e2100425118.
- 620 63 Du T, Buenbrazo N, Kell L, Rahmani S, Sim L, Withers SG, DeFrees S & Wakarchuk W  
621 (2019) A Bacterial Expression Platform for Production of Therapeutic Proteins Containing  
622 Human-like O-Linked Glycans. *Cell Chem Biol* **26**, 203-212.e5.
- 623 64 Planas D, Veyer D, Baidaliuk A, Staropoli I, Guivel-Benhassine F, Rajah MM, Planchais C,  
624 Porrot F, Robillard N, Puech J, Prot M, Gallais F, Gantner P, Velay A, Le Guen J, Kassis-  
625 Chikhani N, Edriss D, Belec L, Seve A, Courtellemont L, Péré H, Hocqueloux L, Fafi-  
626 Kremer S, Prazuck T, Mouquet H, Bruel T, Simon-Lorière E, Rey FA & Schwartz O (2021)  
627 Reduced sensitivity of SARS-CoV-2 variant Delta to antibody neutralization. *Nature* **596**,  
628 276–280.
- 629 65 Shang J, Ye G, Shi K, Wan Y, Luo C, Aihara H, Geng Q, Auerbach A & Li F (2020) Structural  
630 basis of receptor recognition by SARS-CoV-2. *Nature* **581**, 221–224.
- 631 66 Luan B, Wang H & Huynh T (2021) Enhanced binding of the N501Y-mutated SARS-CoV-2  
632 spike protein to the human ACE2 receptor: insights from molecular dynamics simulations.  
633 *FEBS Lett* **595**, 1454–1461.
- 634 67 Chan CEZ, Seah SGK, Chye DH, Massey S, Torres M, Lim APC, Wong SKK, Neo JJY,  
635 Wong PS, Lim JH, Loh GSL, Wang D, Boyd-Kirkup JD, Guan S, Thakkar D, Teo GH,  
636 Purushotorman K, Hutchinson PE, Young BE, Low JG, MacAry PA, Hentze H,  
637 Prativadibhayankara VS, Ethirajulu K, Comer JE, Tseng C-TK, Barrett ADT, Ingram PJ,  
638 Brasel T & Hanson BJ (2021) The Fc-mediated effector functions of a potent SARS-CoV-2  
639 neutralizing antibody, SC31, isolated from an early convalescent COVID-19 patient, are  
640 essential for the optimal therapeutic efficacy of the antibody. *PLoS One* **16**, e0253487.
- 641 68 Ramanathan M, Ferguson ID, Miao W & Khavari PA (2021) SARS-CoV-2 B.1.1.7 and  
642 B.1.351 spike variants bind human ACE2 with increased affinity. *Lancet Infect Dis* **21**,



- 643 1070.
- 644 69 Ali F, Kasry A & Amin M (2021) The new SARS-CoV-2 strain shows a stronger binding  
645 affinity to ACE2 due to N501Y mutant. *Med Drug Discov* **10**, 100086.
- 646 70 Villoutreix BO, Calvez V, Marcelin AG & Khatib AM (2021) In silico investigation of the new  
647 UK (B.1.1.7) and South African (501y.v2) SARS-CoV-2 variants with a focus at the ace2-  
648 spike rbd interface. *Int J Mol Sci* **22**, 1–13.
- 649 71 Socher E, Conrad M, Heger L, Paulsen F, Sticht H, Zunke F & Arnold P (2021) Mutations in  
650 the B.1.1.7 SARS-CoV-2 Spike Protein Reduce Receptor-Binding Affinity and Induce a  
651 Flexible Link to the Fusion Peptide. *Biomedicines* **9**, 525.
- 652 72 Huang SW & Wang SF (2021) SARS-CoV-2 entry related viral and host genetic variations:  
653 Implications on covid-19 severity, immune escape, and infectivity. *Int J Mol Sci* **22**, 1–22.
- 654 73 Greaney AJ, Loes AN, Crawford KHD, Starr TN, Malone KD, Chu HY & Bloom JD (2021)  
655 Comprehensive mapping of mutations in the SARS-CoV-2 receptor-binding domain that  
656 affect recognition by polyclonal human plasma antibodies. *Cell Host Microbe* **29**, 463-  
657 476.e6.
- 658 74 Greaney AJ, Starr TN, Gilchuk P, Zost SJ, Binshtein E, Loes AN, Hilton SK, Huddleston J,  
659 Eguia R, Crawford KHD, Dingens AS, Nargi RS, Sutton RE, Suryadevara N, Rothlauf PW,  
660 Liu Z, Whelan SPJ, Carnahan RH, Crowe JE & Bloom JD (2021) Complete Mapping of  
661 Mutations to the SARS-CoV-2 Spike Receptor-Binding Domain that Escape Antibody  
662 Recognition. *Cell Host Microbe* **29**, 44-57.e9.
- 663 75 Laffeber C, de Koning K, Kanaar R & Lebbink JHG (2021) Experimental Evidence for  
664 Enhanced Receptor Binding by Rapidly Spreading SARS-CoV-2 Variants. *J Mol Biol* **433**,  
665 167058.
- 666 76 Yi C, Sun X, Ye J, Ding L, Liu M, Yang Z, Lu X, Zhang Y, Ma L, Gu W, Qu A, Xu J, Shi Z,  
667 Ling Z & Sun B (2020) Key residues of the receptor binding motif in the spike protein of  
668 SARS-CoV-2 that interact with ACE2 and neutralizing antibodies. *Cell Mol Immunol* **17**,  
669 621–630.
- 670 77 Deng X, Garcia-Knight MA, Khalid MM, Servellita V, Wang C, Morris MK, Sotomayor-  
671 González A, Glasner DR, Reyes KR, Gliwa AS, Reddy NP, Sanchez San Martin C,  
672 Federman S, Cheng J, Balcersek J, Taylor J, Streithorst JA, Miller S, Sreekumar B, Chen P-  
673 Y, Schulze-Gahmen U, Taha TY, Hayashi JM, Simoneau CR, Kumar GR, McMahon S,  
674 Lidsky P V, Xiao Y, Hemarajata P, Green NM, Espinosa A, Kath C, Haw M, Bell J, Hacker  
675 JK, Hanson C, Wadford DA, Anaya C, Ferguson D, Frankino PA, Shivram H, Lareau LF,  
676 Wyman SK, Ott M, Andino R & Chiu CY (2021) Transmission, infectivity, and neutralization  
677 of a spike L452R SARS-CoV-2 variant. *Cell* **184**, 3426-3437.e8.
- 678 78 Motozono C, Toyoda M, Zahradnik J, Saito A, Nasser H, Tan TS, Ngare I, Kimura I, Uriu K,  
679 Kosugi Y, Yue Y, Shimizu R, Ito J, Torii S, Yonekawa A, Shimono N, Nagasaki Y, Minami  
680 R, Toya T, Sekiya N, Fukuhara T, Matsuura Y, Schreiber G, Ikeda T, Nakagawa S, Ueno T  
681 & Sato K (2021) SARS-CoV-2 spike L452R variant evades cellular immunity and increases  
682 infectivity. *Cell Host Microbe* **29**, 1124-1136.e11.
- 683 79 Tchesnokova V, Kulakesara H, Larson L, Bowers V, Rechkina E, Kisiela D, Sledneva Y,  
684 Choudhury D, Maslova I, Deng K, Kutumbaka K, Geng H, Fowler C, Greene D, Ralston J,

- 685 Samadpour M & Sokurenko E (2021) Acquisition of the L452R mutation in the ACE2-  
686 binding interface of Spike protein triggers recent massive expansion of SARS-Cov-2  
687 variants. *J Clin Microbiol*, doi:10.1128/JCM.00921-21.
- 688 80 Li Q, Wu J, Nie J, Zhang L, Hao H, Liu S, Zhao C, Zhang Q, Liu H, Nie L, Qin H, Wang M, Lu  
689 Q, Li X, Sun Q, Liu J, Zhang L, Li X, Huang W & Wang Y (2020) The Impact of Mutations in  
690 SARS-CoV-2 Spike on Viral Infectivity and Antigenicity. *Cell* **182**, 1284-1294.e9.
- 691 81 Kuznedelov K, Minakhin L, Niedziela-Majka A, Dove SL, Rogulja D, Nickels BE, Hochschild  
692 A, Heyduk T & Severinov K (2002) A role for interaction of the RNA polymerase flap  
693 domain with the  $\sigma$  subunit in promoter recognition. *Science* **295**, 855–857.
- 694 82 Deighan P, Diez CM, Leibman M, Hochschild A & Nickels BE (2008) The bacteriophage  $\lambda$  Q  
695 antiterminator protein contacts the  $\beta$ -flap domain of RNA polymerase. *Proc Natl Acad Sci*  
696 **105**, 15305–15310.
- 697 83 Chung CT, Niemela SL & Miller RH (1989) One-step preparation of competent *Escherichia*  
698 *coli*: transformation and storage of bacterial cells in the same solution. *Proc Natl Acad Sci*  
699 **86**, 2172–2175.
- 700 84 Deaconescu AM, Chambers AL, Smith AJ, Nickels BE, Hochschild A, Savery NJ & Darst SA  
701 (2006) Structural Basis for Bacterial Transcription-Coupled DNA Repair. *Cell* **124**, 507–  
702 520.
- 703 85 Thibodeau SA, Fang R & Joung JK (2004) High-throughput  $\beta$ -galactosidase assay for  
704 bacterial cell-based reporter systems. *Biotechniques* **36**, 410–415.
- 705

## 706 Figure Legends

707 **Fig. 1: Bacterial two-hybrid assay used to study the SARS-CoV-2 interactome.** (A) (top)  
708 Schematic depiction of the employed transcription-based bacterial two-hybrid system.  
709 Interaction between protein moieties X (purple) and Y (slate blue), which are fused to the N-  
710 terminal domain of the  $\alpha$  subunit of *E. coli* RNAP ( $\alpha$ NTD) and the  $\lambda$ CI protein, respectively,  
711 stabilizes the binding of RNAP to test promoter  $p_{lacO_L2-62}$ , thereby activating transcription of  
712 the *lacZ* reporter gene. The test promoter bears the  $\lambda$  operator  $O_L2$  centered at position -62  
713 upstream of the transcription start site. (bottom) *E. coli* cell containing genetic elements that are  
714 involved in the bacterial two-hybrid system. The chromosomal *lacZ* locus is deleted and the test  
715 promoter and fused *lacZ* reporter gene are encoded on an F' episome. The  $\lambda$ CI-Y and  $\alpha$ NTD-X  
716 fusion proteins are encoded on compatible plasmids and produced under the control of IPTG-  
717 inducible promoters. (B) List of all tested SARS-CoV-2 ORFs as predicted by the NCBI  
718 reference genome (Accession #: NC\_045512.2). The respective nucleotide range for each ORF  
719 based on the NCBI reference sequence is indicated, together with the resulting amino acid  
720 sequence length. Except for the spike protein, all ORFs were cloned as full-length genes. For  
721 spike, we chose to test the interaction of its ectodomain (aa 16-1213) to avoid complications  
722 due to its N-terminal signal peptide and C-terminal transmembrane domain.

723

724 **Fig. 2: Detection of protein-protein interactions by the bacterial two-hybrid system.**  
725 Interaction matrix of all tested ORFs. Positive interactions, regardless of the fusion partner, are  
726 indicated with purple squares and self-interactions are indicated by orange-framed squares.  
727 Detailed information about fusion constructs for which positive interactions were identified is  
728 given in Supplementary Fig. 1. To avoid data duplication, only one half of the matrix is shown  
729 while the other is shaded in grey.

730

731 **Fig. 3: Strong SARS-CoV-2 protein-protein interactions identified by B2H assays.** Shown  
732 are two-hybrid data for strong interactions (arbitrarily defined as Miller units > 500). Indicated  
733 ORFs are fused either to the  $\alpha$ NTD (indicated as  $\alpha$ ) or to full-length  $\lambda$ CI (indicated as CI).  $\alpha$  and  
734  $\lambda$ CI negative controls express full-length  $\alpha$  and full-length  $\lambda$ CI, respectively. The interaction of  
735 domain 4 of the RNAP  $\sigma^{70}$  subunit (fused to the  $\alpha$ NTD) with the flap domain of the RNAP  $\beta$   
736 subunit (fused to  $\lambda$ CI) served as a positive control (pos) [81,82]. Bar graphs show the averages  
737 of three biological replicates (n=3) and  $\beta$ -galactosidase activities are given in Miller units. Error  
738 bars indicate the standard deviation. Values indicated with asterisks are significantly different  
739 from the negative control. \*\*\*\*:  $P < 0.0001$  (One-way ANOVA with Turkey's multiple comparison  
740 test).

741 **Fig. 4: Selective disruption of protein interfaces for protein with two interaction partners.**  
742 (A) Depiction of crystal structure (PDB ID: 5NFY [29]) of SARS-CoV-1 Nsp10 (pale cyan) in  
743 complex with Nsp14 (pale pink). Zoom-in shows amino acids (sticks) chosen for mutational  
744 analysis of Nsp10 (orange, olive, and burgundy) and their corresponding main interaction  
745 partners in Nsp14 (pale pink). (B) B2H results showing effects of Nsp10 substitutions on its  
746 interactions with Nsp14 and with Nsp16. Amino acid substitutions introduced into Nsp10 are  
747 given in the box. (C) Depiction of crystal structure of the SARS-CoV-2 Nsp16-Nsp10 protein  
748 complex (PDB ID: 6W4H [31]) colored respectively in pale yellow and pale cyan. Additional N-  
749 terminal Nsp10<sup>7-22</sup> region is included and was obtained from superimposed Nsp10 structure  
750 from PDB ID: 5NFY (green). Zoom-in shows amino acids (sticks) chosen for mutational analysis  
751 of Nsp16 (orange and burgundy) and their corresponding main interaction partners in Nsp10  
752 (pale cyan). (D) B2H results showing effects of Nsp16 substitutions on its interactions with  
753 Nsp10 and with Nsp15. Amino acid substitutions introduced into Nsp16 are given in the box.  
754 (B,D) Indicated ORFs are fused either to the  $\alpha$ NTD (indicated as  $\alpha$ ) or to full-length  $\lambda$ CI.  $\alpha$  and  
755  $\lambda$ CI negative controls express full-length  $\alpha$  and full length  $\lambda$ CI, respectively. Bar graphs show  
756 the averages of three biological replicates (n=3) and  $\beta$ -galactosidase activities are given in Miller  
757 units. Error bars indicate the standard deviation. Values indicated with asterisks are significantly  
758 different from the WT. ns: not significant; \*: P<0.05; \*\*: P<0.01; \*\*\*\*: P<0.0001 (One-way  
759 ANOVA with Dunnett's multiple comparison test). Black dashed lines in A and C represent  
760 hydrogen bonds.

761

762 **Fig. 5: Interaction of spike RBD and ACE2 in an oxidizing *E. coli* strain.** (A) Bacterial two-  
763 hybrid assays of (A) spike domains (as listed in Supplementary Fig. 7) tested against ACE2 in  
764 BLS148, (B) indicated spike RBD cysteine mutants tested against ACE2 in BLS148 and B2H or  
765 (C) indicated spike RBD circulating variants tested against ACE2 in BLS148. FL: full-length,  
766 NTD: N-terminal domain; RBD: receptor binding domain; CTD: C-terminal domain (with or  
767 without transmembrane domain (TMD)), Ecto: Ectodomain starting either at aa 13 or 16. (D)  
768 Schematic depicting amino acid substitutions present in each of three RBD variants tested. The  
769 measured effect of each substitution on ACE2 binding is indicated with a dash (no effect), a  
770 downward pointing arrow (weakened binding) or an upward pointing arrow (strengthened  
771 binding). (A-C) spike domains or RBD mutant variants were fused to the  $\alpha$ NTD (indicated as  $\alpha$ )  
772 and ACE2 was fused to full-length  $\lambda$ CI.  $\alpha$  and  $\lambda$ CI negative controls express full-length  $\alpha$  and  
773 full-length  $\lambda$ CI, respectively. Bar graphs show (A) one biological replicate or (B,C) the averages  
774 of three biological replicates (n=3) and  $\beta$ -galactosidase activities are given in Miller units. Note:  
775 results depicted in (C) have been confirmed in a total of seven independent experiments, one of  
776 which is shown here. Error bars indicate the standard deviation. Values indicated with asterisks  
777 are significantly different from the negative control. ns: not significant; \*: P<0.05; \*\*: P<0.01; \*\*\*\*:  
778 P<0.0001 (Two-way ANOVA with Turkey's multiple comparison test). Western blot analysis  
779 indicated that the spike RBD mutants used in (B) and (C) are present at intracellular levels  
780 comparable to the wild-type RBD, ruling out protein instability as a cause for the observed  
781 effects (Supplementary Figs. 8 and 9).

## 782 **Supplementary Figure Legends**

783 **Supplementary Fig. 1: Fusion constructs of positive B2H interactions.** List of all B2H-  
784 identified SARS-CoV-2 PPIs. Green-shaded rectangles indicate the plasmid from which Protein  
785 A (first-mentioned protein in the left column) is produced to elicit a positive interaction with  
786 Protein B encoded by the other plasmid. When an interaction of Protein A and Protein B was  
787 identified regardless of the encoding plasmid, rectangles are shaded green in the column “both”.

788 **Supplementary Fig. 2: Medium-to-weak SARS-CoV-2 protein-protein interactions**  
789 **identified B2H assays.** Shown are two-hybrid data for medium-to-weak interactions (Miller unit  
790 values between 2- and 5-fold above the negative control Miller unit value). Indicated ORFs are  
791 fused either to the  $\alpha$ NTD (indicated as  $\alpha$ ) or to full-length  $\lambda$ CI (indicated as CI).  $\alpha$  and  $\lambda$ CI  
792 negative controls express full-length  $\alpha$  and full-length  $\lambda$ CI, respectively. The interaction of  
793 domain 4 of the RNAP  $\sigma^{70}$  subunit (fused to the  $\alpha$ NTD) with the flap domain of the RNAP  $\beta$   
794 subunit (fused to  $\lambda$ CI) served as a positive control (pos) [81,82]. Bar graphs show the averages  
795 of three biological replicates (n=3) and  $\beta$ -galactosidase activities are given in Miller units. Error  
796 bars indicate the standard deviation. Values indicated with asterisks are significantly different  
797 from the negative control. \*\*\*: P<0.001; \*\*\*\*: P<0.0001 (One-way ANOVA with Turkey’s multiple  
798 comparison test).

799 **Supplementary Fig. 3: Comparison of B2H with Y2H and co-IP data.** Interaction matrix  
800 showing all SARS-CoV-2 PPIs identified with the B2H assay (this study) or with the Y2H and co-  
801 IP assays [6]. Squares designating PPIs identified solely by the B2H assay are colored purple  
802 and contain a white disc, whereas squares designating PPIs identified solely by the Y2H assay  
803 or by co-IP experiments are colored red and blue, respectively. Squares designating  
804 interactions that were identified by two or three of the assays contain the respective colors as  
805 indicated in the key at the left side of the matrix.

806 **Supplementary Fig. 4: Comparison of SARS-CoV-2 B2H data with SARS-CoV-1 two-**  
807 **hybrid data.** Interaction matrix showing the sixteen PPIs identified with the B2H assay (this  
808 study) and indicating which of these PPIs were also identified in at least one of three previous  
809 SARS-CoV-1 two hybrid studies, including two Y2H analyses [7,27] and one mammalian two-  
810 hybrid analysis [26]. Squares designating PPIs identified solely by the B2H assay are colored  
811 purple and contain a white disc. Coloring within the central disc designates a PPI that was also  
812 identified in one or two of the SARS-CoV-1 two-hybrid analyses (von Brunn *et al.* [7], orange;  
813 Imbert *et al.* [27], yellow; Pan *et al.* [26], cyan). Note that none of the PPIs were identified in all  
814 three SARS-CoV-1 analyses.

815 **Supplementary Fig. 5: Western blot analysis showing intracellular levels of Nsp10, Nsp14**  
816 **and Nsp16 fusion proteins.** (top) Anti- $\alpha$ NTD and (bottom) anti- $\lambda$ CI western blot of cell lysates  
817 taken from over-night cultures of cells used for B2H analysis shown in **Fig. 4B**. Samples in  
818 lanes 1-5 are from cells producing the indicated  $\lambda$ CI-Nsp10 fusion protein or  $\lambda$ CI (see key) and  
819 the  $\alpha$ -Nsp16 fusion protein, whereas samples in lanes 10-14 are from cells producing the  
820 indicated  $\lambda$ CI-Nsp10 fusion protein or  $\lambda$ CI and the  $\alpha$ -Nsp14 fusion protein. Samples in lanes 6-9  
821 are from cells producing the indicated  $\lambda$ CI-Nsp10 fusion protein and full-length  $\alpha$ . We note that  
822 substitutions D29A+S33A appeared to be mildly destabilizing, whereas substitutions  
823 F16A+F19A+V21A appeared to be mildly stabilizing.

824 **Supplementary Fig. 6: Western blot analysis showing intracellular levels of Nsp10, Nsp15**  
825 **and Nsp16 fusion proteins.** (top) Anti- $\alpha$ NTD and (bottom) anti- $\lambda$ CI western blot of cell lysates  
826 taken from over-night cultures of cells used for the subsequent B2H analysis shown in **Fig. 4D**.  
827 Samples in lanes 1-5 are from cells producing the indicated  $\alpha$ -Nsp16 fusion protein or  $\alpha$  (see  
828 key) and the  $\lambda$ CI-Nsp10 fusion protein, whereas samples in lanes 10-14 are from cells  
829 producing the indicated  $\alpha$ -Nsp16 fusion protein or  $\alpha$  and the  $\lambda$ CI-Nsp15 fusion protein. Samples  
830 in lanes 6-9 are from cells producing the indicated  $\alpha$ -Nsp16 fusion protein and full-length  $\lambda$ CI.  
831 Lanes indicated with "X" are not discussed in the current manuscript but were not cut from the  
832 blot to avoid excessive manipulations of the original image. Note: Native, chromosomally  
833 encoded full-length  $\alpha$  is detected in all samples.

834 **Supplementary Fig. 7: Domains of the SARS-CoV-2 spike protein.** Depiction of SARS-CoV-  
835 2 spike domains, including the signal peptide (SP, predicted from aa 1-13 or 1-16), the N-  
836 terminal domain (NTD, aa 1-330), the receptor binding domain (RBD, aa 331-521), the C-  
837 terminal domain (CTD, aa 522-1273) and the transmembrane domain (TMD, aa 1202-1273).  
838 The table lists the spike domains that were produced in *E. coli* (as B2H fusion proteins) and  
839 tested for interaction with ACE2, their precise corresponding loci on the SARS-CoV-2 genome,  
840 and the amino acids encoded by each test domain.

841 **Supplementary Fig. 8: Western blot analysis showing intracellular levels of spike RBD**  
842 **fusion proteins in oxidizing vs. reducing *E. coli* test strains.** (top) Anti- $\alpha$ NTD and (bottom)  
843 anti- $\lambda$ CI Western blot of cell lysates taken from over-night cultures of BLS148 or B2H cells used  
844 for the subsequent two-hybrid analyses shown in **Fig. 5B**. Samples in lanes 1-5 and 10-14 are  
845 from BLS148 cells and B2H cells, respectively, producing the indicated  $\alpha$ -RBD fusion protein or  
846  $\alpha$  (see key) and the  $\lambda$ CI-ACE2 fusion protein, whereas samples in lanes 6-9 and 15-18 are from  
847 BLS148 cells and B2H cells, respectively, producing the indicated  $\alpha$ -RBD fusion protein and full-  
848 length  $\lambda$ CI. Lanes indicated with "X" are not discussed in the current manuscript but were not  
849 cut from the blot to avoid excessive manipulations of the original image. White dotted line  
850 indicates stitched image where extraneous material was removed. Note: Native, chromosomally  
851 encoded full-length  $\alpha$  is detected in all samples.

852 **Supplementary Fig. 9: Western blot analysis showing intracellular levels of spike RBD**  
853 **mutants.** (top) Anti- $\alpha$ -NTD and (bottom) anti- $\lambda$ CI western blot of cell lysates taken from over-  
854 night cultures of BLS148 cells used for the subsequent two-hybrid analysis shown in **Fig. 5C**.

855 Samples in lanes 1-9 are from cells producing the indicated  $\alpha$ -RBD fusion protein or  $\alpha$  (see key)  
856 and the  $\lambda$ CI-ACE2 fusion protein, whereas samples in lanes 10-17 are from cells producing the  
857 indicated  $\alpha$ -RBD fusion protein and full-length  $\lambda$ CI. Note: Native, chromosomally encoded full-  
858 length  $\alpha$  in all samples.

859 **Supplementary Table Legends**

860 **Supplementary Table 1:** List of (A) strains and plasmids, and (B) oligonucleotide primers used  
861 in this study.

862 **Acknowledgments**

863 We thank Eleanor Fleming, Zoë Feder, Kemardo Henry, EmilyKate McDonough, Hanif  
864 Vahedian Movahed and Simon Dove for valuable discussion; Simon Dove and Jonathan  
865 Abraham for comments on the manuscript; and Sydney Rosa Teixeira for technical support.  
866 BLS, PD and AH were supported by a “Maximizing Investigators' Research Award” (MIRA; No.  
867 R35GM136247) awarded to AH.

868 **Author contribution**

869 AH and BLS designed the study. BLS performed the experimental work with support from PD.  
870 GG analyzed crystal structure data and provided predictions for the mutational screens. BLS  
871 and AH drafted the manuscript with contributions from all coauthors.

872 **Competing interests**

873 The authors declare no competing interests.

874 **Data availability**

875 All data generated during and/or analyzed during the current study are either provided within the  
876 manuscript or are available from the corresponding authors upon reasonable request.



## 877 **Material and Methods**

### 878 *Bacterial strains and growth conditions*

879 *E. coli* strains MAX Efficiency™ DH5 $\alpha$ F'IQ (Invitrogen) and NEB® 5-alpha F'IQ (New England  
880 Biolabs, NEB) were used for routine cloning procedures and chemically competent *E. coli* were  
881 transformed with plasmid DNA by the standard heat shock procedure. FW102 O<sub>L</sub>2–62 and  
882 BLS148 strains were used for bacterial two-hybrid assays. All strains listed in Supplementary  
883 Table 1A were grown in LB medium containing the appropriate antibiotics at standard  
884 concentrations. BLS148 was created by P1 phage transduction of  $\Delta lacZYA::kmR$  from strain  
885 TB12 (P1 phage lysates were a gift from Thomas Bernhardt, Harvard Medical School) to  
886 SHuffle® Express (NEB) according to a protocol established by Robert T. Sauer (Massachusetts  
887 Institute of Technology; protocol available at:  
888 [https://openwetware.org/wiki/Sauer:P1vir\\_phage\\_transduction](https://openwetware.org/wiki/Sauer:P1vir_phage_transduction)), generating BLS128. Deletion of  
889 *lacZ* in BLS128 was verified by colony PCR (using primers oBLS107+oBLS108 targeting *lacZ* to  
890 test for absence of *lacZ* and primers oBLS109+oBLS110 targeting *motA* and primers  
891 oBLS138+oBLS139 targeting *cyaA* as control reactions). Next, TSS competent BLS128 cells  
892 were created according to [83], transformed with pCP20 (encoding the yeast Flp recombinase  
893 gene to flip out the kanamycin resistance gene) and grown over night at 30 °C on LB plates  
894 containing carbenicillin (100  $\mu$ g/ml; Carb100). The next day, 10 colonies were picked and re-  
895 streaked on LB plates without antibiotics and then grown over night at 42 °C. From each of  
896 those strains a single colony was picked and re-streaked on LB plates containing either  
897 Carb100, kanamycin (20  $\mu$ g/ml; Km20) or spectinomycin (50  $\mu$ g/ml, Sp50) and grown over night  
898 at 30 °C. A single Sp50 resistant but Carb100 and Km20 sensitive colony was picked and re-  
899 verified by streaking on the same growth plates. This strain that had lost the *kmR* resistance  
900 cassette was then designated BLS133. Finally, the  $\beta$ -galactosidase reporter present on the F'  
901 was introduced into BLS133 by mating with strain FW102 O<sub>L</sub>2–62 [84]. For this, both BLS133

902 and FW102 O<sub>2</sub>-62 were grown over night at 37 °C in LB Sp50 or Km20, respectively, and then  
903 streaked on top of each other on the same LB plate. After about 8 hours at 37 °C cells were  
904 resuspended in LB and plated in serial dilutions on LB plates containing Sp50, Km20 and X-gal  
905 (40 µg/ml; X-gal40) and then grown over night at 37 °C. A blue colony was picked and re-  
906 verified by streaking again on a LB plate containing Sp50, Km20 and X-gal40, creating BLS148,  
907 a bacterial two-hybrid-compatible SHuffle<sup>®</sup> Express strain.

#### 908 *Plasmid construction*

909 All plasmids generated in this study (see Supplementary Table 1A) were either constructed  
910 using standard restriction enzyme-based cloning procedures or by Gibson assembly. Gibson  
911 assembly was performed for 1 h at 50 °C by default. Primers employed for plasmid construction  
912 are listed in Supplementary Table 1B. Plasmid sequence integrity was verified by Sanger  
913 sequencing from Genewiz or Quintarabio (both Boston, MA, USA). Unless otherwise stated, all  
914 sequence templates, except for Nsp11, were ordered as *E. coli* codon-optimized gene  
915 fragments from Twist Bioscience (San Francisco, CA, USA).

916 Except for spike, Nsp2, Nsp3, RNA-Polymerase (Nsp12) and helicase (Nsp13), all full-length  
917 codon-optimized gene fragments were digested with NotI+BamHI, purified by DNA Clean &  
918 Concentrator kit (Zymo Research) and then ligated into 50 ng NotI+BamHI-digested pBR $\alpha$  or  
919 pAC $\lambda$ CI using T4 ligase (NEB) according to standard protocols generating the plasmids listed in  
920 Supplementary Table 1A.

921 Spike: For pS63, the spike full-length (FL) sequence was amplified from *E. coli* codon-optimized  
922 gene fragments by SARS\_67+SARS\_68 and cloned into NotI+BamHI-digested pBR $\alpha$  by Gibson  
923 assembly. For pS64, the NTD sequence was amplified from pS63 by SARS\_67+SARS\_69 and  
924 then cloned into NotI+BamHI-digested pBR $\alpha$  by Gibson assembly. For pS65, the RBD  
925 sequence was amplified from pS63 by SARS\_70+SARS\_71 and then cloned into NotI+BamHI-

926 digested pBR $\alpha$  by Gibson assembly. For pS66, the CTD sequence was amplified from pS63 by  
927 SARS\_68+SARS\_72 and then cloned into NotI+BamHI-digested pBR $\alpha$  by Gibson assembly.  
928 For pS67, the Ectodomain (aa 13-1213) was amplified from pS63 by SARS\_73+SARS\_74 and  
929 then cloned into NotI+BamHI-digested pBR $\alpha$  by Gibson assembly. For pS68, the Ectodomain  
930 (aa 16-1213) was amplified from pS63 by SARS\_74+SARS\_75 and then cloned into  
931 NotI+BamHI-digested pBR $\alpha$  by Gibson assembly. pS70 was generated by site-directed  
932 mutagenesis (SDM; see below) using primers SARS\_17+SARS\_76 and pS63 as a template.  
933 For pS72, FL spike was amplified from pS63 by SARS\_77+SARS\_78 and then cloned into  
934 NotI+BamHI-digested pAC $\lambda$ CI by Gibson assembly. For pS73, the NTD sequence was amplified  
935 from pS63 by SARS\_77+SARS\_79 and then cloned into NotI+BamHI-digested pAC $\lambda$ CI by  
936 Gibson assembly. For pS74, the RBD sequence was amplified from pS63 by  
937 SARS\_80+SARS\_81 and then cloned into NotI+BamHI-digested pAC $\lambda$ CI by Gibson assembly.  
938 For pS75, the CTD sequence was amplified from pS63 by SARS\_78+SARS\_82 and then cloned  
939 into NotI+BamHI-digested pAC $\lambda$ CI by Gibson assembly. For pS76, the Ectodomain (aa 13-  
940 1213) was amplified from pS63 by SARS\_83+SARS\_84 and then cloned into NotI+BamHI-  
941 digested pAC $\lambda$ CI by Gibson assembly. For pS77, the Ectodomain (aa 16-1213) was amplified  
942 from pS63 by SARS\_84+SARS\_85 and then cloned into NotI+BamHI-digested pAC $\lambda$ CI by  
943 Gibson assembly. pS79 was generated by SDM using primers SARS\_17+SARS\_86 and pS63  
944 as a template.

945 Nsp2: The Nsp2 sequence was ordered as two single gene fragments, which were further  
946 amplified by PCR using primers SARS\_109+SARS\_110 or SARS\_111+SARS\_112 and then  
947 cloned into NotI+BamHI-digested pBR $\omega$ GP by Gibson assembly, creating pS85. Next, the whole  
948 Nsp2 open reading frame (ORF) was cut from pS85 by NotI+BamHI and inserted into 50 ng

949 NotI+BamHI-digested pBR $\alpha$  or pAC $\lambda$ CI using T4 ligase (NEB) according to standard protocols,  
950 creating pS179 and pS180, respectively.

951 Nsp3: The Nsp3 sequence was ordered as four single gene fragments, which were further  
952 amplified by PCR using primers SARS\_115+SARS\_116, SARS\_117+SARS\_118,  
953 SARS\_119+SARS\_120 or SARS\_121+SARS\_122 and then cloned into NotI+BamHI-digested  
954 pBR $\omega$ GP by Gibson assembly, creating pS89. Next, the whole Nsp3 open reading frame (ORF)  
955 was cut from pS89 by NotI+BamHI and inserted into 50 ng NotI+BamHI-digested pBR $\alpha$  or  
956 pAC $\lambda$ CI using T4 ligase (NEB) according to standard protocols, creating pS181 and pS182,  
957 respectively.

958 RNA-Polymerase (Nsp12): The RNA-Polymerase sequence was ordered as three single gene  
959 fragments, which were further amplified by PCR using primers SARS\_131+SARS\_132,  
960 SARS\_133+SARS\_134 or SARS\_135+SARS\_136 and then cloned into NotI+BamHI-digested  
961 pBR $\omega$ GP by Gibson assembly, creating pS173. Next, the whole Nsp3 open reading frame  
962 (ORF) was cut from pS89 by NotI+BamHI and inserted into 50 ng NotI+BamHI-digested pBR $\alpha$   
963 or pAC $\lambda$ CI using T4 ligase (NEB) according to standard protocols, creating pS181 and pS182,  
964 respectively.

965 helicase (Nsp13): The helicase sequence was ordered as two single gene fragments, which  
966 were further amplified by PCR using primers SARS\_125+SARS\_126 or SARS\_127+SARS\_128  
967 and then cloned into NotI+BamHI-digested pBR $\omega$ GP by Gibson assembly, creating pS169.  
968 Next, the whole Nsp2 open reading frame (ORF) was cut from pS85 by NotI+BamHI and  
969 inserted into 50 ng NotI+BamHI-digested pBR $\alpha$  or pAC $\lambda$ CI using T4 ligase (NEB) according to  
970 standard protocols, creating pS221 and pS222, respectively.

971 ACE2: The ACE2 N-terminal peptidase domain (aa 19-615) was ordered as a single gene  
972 fragment and then further amplified by PCR using primers SARS\_264+SARS\_265 or  
973 SARS\_266+SARS\_267 and then cloned into 50 ng NotI+BamHI-digested pBR $\alpha$  or pAC $\lambda$ CI by  
974 Gibson assembly, creating pS260 and pS261, respectively.

975 Nsp11 was cloned into pBR $\alpha$  or pAC $\lambda$ CI as annealed primers. For this, 10  $\mu$ l of 100  $\mu$ M  
976 SARS\_139 and SARS\_140 primers were mixed with 1  $\mu$ l T4 Polynucleotide kinase (PNK; NEB)  
977 in 1x PNK reaction buffer (NEB). The reaction mix was placed in a BioRad T100 Thermal cycler,  
978 incubated for 30 min at 37  $^{\circ}$ C, inactivated for 5 min at 95  $^{\circ}$ C and then cooled to 4  $^{\circ}$ C at a 0.1  
979  $^{\circ}$ C/s ramp rate. The annealed oligos were diluted 1:50 and then ligated into 50 ng NotI+BamHI-  
980 digested pBR $\alpha$  or pAC $\lambda$ CI using T4 ligase (NEB), generating pS197 and pS198, respectively.

#### 981 *Plasmid mutagenesis*

982 Plasmid mutagenesis to create SARS-CoV-2 mutant genes was achieved using the Q5<sup>®</sup> Site-  
983 Directed Mutagenesis (SDM) Kit according to the manufacturer's instructions (NEB) or by using  
984 Gibson assembly with mutations introduced into the complementary overhang regions of the  
985 primer sequences. For the Gibson assembly, plasmids were amplified with the indicated primer  
986 pairs and 1  $\mu$ l of the resulting PCR reaction was then ligated by Gibson assembly in a 10  $\mu$ l  
987 reaction volume.

988 pS254 was generated by SDM using primers SARS\_253+SARS\_254 and plasmid pS215 as a  
989 template. pS256 was generated by SDM using primers SARS\_256+SARS\_257 and plasmid  
990 pS215 as a template. pS257 was generated by SDM using primers SARS\_256+SARS\_257 and  
991 plasmid pS254 as a template. pS262 was generated by Gibson assembly using primers  
992 SARS\_268+SARS\_269 and plasmid pS196 as a template. pS263 was generated by Gibson  
993 assembly using primers SARS\_270+SARS\_271 and plasmid pS196 as a template. pS264 was  
994 generated by Gibson assembly using primers SARS\_272+SARS\_273 and plasmid pS196 as a

995 template. pS267 was generated by Gibson assembly using primers SARS\_280+SARS\_281 and  
996 plasmid pS65 as a template. pS271 was generated by Gibson assembly using primers  
997 SARS\_287+SARS\_288 and plasmid pS65 as a template. pS272 was generated by Gibson  
998 assembly using primers SARS\_289+SARS\_290 and plasmid pS65 as a template. pS273 was  
999 generated by Gibson assembly using primers SARS\_289+SARS\_290 and plasmid pS271 as a  
1000 template. pS275 was generated by Gibson assembly using primers SARS\_295+SARS\_296 and  
1001 plasmid pS65 as a template. pS276 was generated by Gibson assembly using primers  
1002 SARS\_291+SARS\_292 and plasmid pS65 as a template. pS277 was generated by Gibson  
1003 assembly using primers SARS\_293+SARS\_294 and plasmid pS65 as a template. pS278 was  
1004 generated by Gibson assembly using primers SARS\_291+SARS\_292 and plasmid pS267 as a  
1005 template. pS279 was generated by Gibson assembly using primers SARS\_293+SARS\_294 and  
1006 plasmid pS267 as a template. pS280 was generated by Gibson assembly using primers  
1007 SARS\_293+SARS\_294 and plasmid pS278 as a template.

#### 1008 *β-galactosidase assays*

1009  $\beta$ -galactosidase assays to study the SARS-CoV-2 interactome were performed essentially as  
1010 described previously [85]. In particular, pBR $\alpha$  and pAC $\lambda$ CI plasmids containing the indicated  
1011 inserts were co-transformed into FW102 O<sub>L</sub>2–62 by the heat shock procedure. Briefly, 2  $\mu$ l of  
1012 each plasmid (1:10 dil.) were mixed with 20  $\mu$ l chemically competent FW102 O<sub>L</sub>2–62 cells,  
1013 incubated on ice in 96-well PCR plates (VWR) for 30 min and then heat-shocked for 1 min at 42  
1014 °C in a BioRad T100 Thermal cycler. Cells were placed on ice for 5 min, recovered in 80  $\mu$ l  
1015 fresh LB medium and then incubated at 37 °C for 1 h (Please note: we found that commercially  
1016 available premixed LB drastically reduces transformation efficiency and also subsequent over  
1017 night culture growth; we thus recommend using non-premixed LB medium instead). The 96-well  
1018 plates were sealed with Rayon Films (VWR) to allow proper aeration and prevent  
1019 contamination. Afterwards, 50  $\mu$ l of transformed cells were transferred to 2 ml deep well plates

1020 containing 500  $\mu$ l LB Carb100, chloramphenicol (25  $\mu$ g/ml; Cm25), Km20 and 5  $\mu$ M IPTG and  
1021 grown over night at 37  $^{\circ}$ C, 800 rpm. The next day, 4  $\mu$ l over-night culture was transferred to 96-  
1022 well flat bottom microtiter plates containing 200  $\mu$ l LB Carb100, Cm25, Km20 and 20  $\mu$ M IPTG  
1023 and grown until approx. OD<sub>600</sub> 0.15-0.2 (measured in a VERSA Max microplate reader,  
1024 Molecule Devices, San Jose, CA, USA). Then, 20  $\mu$ l lysis solution (for one 96-well plate mix: 1.2  
1025 ml PopCulture<sup>®</sup> Reagent (MilliporeSigma, MA, USA), 2.5  $\mu$ l 400 U/ $\mu$ l rLysozyme<sup>™</sup>  
1026 (MilliporeSigma, MA, USA) and 1.25  $\mu$ l Benzonase<sup>®</sup> Nuclease (MilliporeSigma, MA, USA)) was  
1027 added to the cells and incubated for at least 30 min at 37  $^{\circ}$ C and 800 rpm (longer incubation  
1028 times were found to not negatively affect the experimental results). Afterwards, 30  $\mu$ l lysed cell  
1029 suspension was added to a fresh 96-well flat-bottom microtiter plate containing 150  $\mu$ l Z-  
1030 buffer/ONPG solution (60 mM Na<sub>2</sub>HPO<sub>4</sub>, 40 mM NaH<sub>2</sub>PO<sub>4</sub>, 10 mM KCl, 1 mM MgSO<sub>4</sub>, 1 mg/ml  
1031 ortho-Nitrophenyl- $\beta$ -galactoside (ONPG)) and OD<sub>420</sub> values were recorded in a VERSA Max  
1032 microplate reader (Molecule Devices, San Jose, CA, USA).  $\beta$ -galactosidase activity in Miller  
1033 units was then calculated as described previously [85].

1034  $\beta$ -galactosidase assays to study the RBD-ACE2 interaction were performed as follows. Strain  
1035 BLS148 was transformed with the appropriate plasmids, as described in the preceding  
1036 paragraph. Upon recovery of the transformed cells for 1 h at 37  $^{\circ}$ C, 50  $\mu$ l cells were then  
1037 transferred to 500  $\mu$ l LB Carb100, Km20, Cm25 and 50  $\mu$ M IPTG and grown for approx. 20 h at  
1038 30  $^{\circ}$ C and 800 rpm. Subsequently, 15  $\mu$ l cells were transferred to 185  $\mu$ l LB medium in 96-well  
1039 microtiter plates, combined with 20  $\mu$ l lysis solution (for one 96-well plate: 1.2 ml PopCulture<sup>®</sup>  
1040 Reagent (MilliporeSigma, MA, USA), 5.0  $\mu$ l 400U/ $\mu$ l rLysozyme<sup>™</sup> (MilliporeSigma, MA, USA)  
1041 and 2.5  $\mu$ l Benzonase<sup>®</sup> Nuclease (MilliporeSigma, MA, USA)) and incubated for at least 30 min  
1042 at 30  $^{\circ}$ C, 800 rpm. All subsequent steps were then performed as described above.

1043

1044 *Western blot analysis*

1045 To verify the production of the respective fusion proteins, western blots of cell lysates from over-  
1046 night cultures were performed. For this, co-transformed cells were grown in the indicated IPTG  
1047 concentration over-night in 550  $\mu$ l total volume in 2 ml deep well plates at 30 or 37 °C, 800 rpm.  
1048 The next day, OD<sub>600</sub> values were recorded and 500  $\mu$ l cells were pelleted by centrifugation (1  
1049 min, 21,000 x g, room temperature (RT)) and either stored at -80 °C or directly processed. Cell  
1050 pellets were then resuspended in lysis buffer (BugBuster® Protein Extraction Reagent  
1051 (MilliporeSigma, MA, USA) supplemented with 1x cOmplete™, EDTA-free Protease Inhibitor  
1052 Cocktail (MilliporeSigma, MA, USA), 1 U/ $\mu$ l rLysozyme™ (MilliporeSigma, MA, USA; final  
1053 concentration) and 0.5 U/ $\mu$ l Benzonase® Nuclease (MilliporeSigma, MA, USA, final  
1054 concentration)). The amount of lysis buffer for each cell pellet was calculated as follows:  $\mu$ l lysis  
1055 buffer = OD<sub>600</sub> x ml of culture pelleted x 60. Cells were lysed for 30 min at RT in an overhead  
1056 shaker. Next, lysed cells were mixed 1:5 in PBS (10.14 mM Na<sub>2</sub>HPO<sub>4</sub>, 1.76 mM NaH<sub>2</sub>PO<sub>4</sub>, 2.7  
1057 mM KCl, 137 mM NaCl; pH 7.4, Boston Bioproducts, MA, USA) and then incubated in 1 x  
1058 Laemmli SDS sample buffer (Boston Bioproducts, MA, USA) at 95 °C for 10 min. 10  $\mu$ l of the  
1059 resulting solution was then applied to either 4–12% Criterion™ XT Bis-Tris Protein Gels  
1060 (BioRad, Hercules, CA, USA) or NuPAGE™ 4 - 12% Bis-Tris Mini Protein Gels (Thermo Fisher  
1061 Scientific, MA, USA). Upon gel separation, proteins were transferred to Amersham Protran 0.45  
1062 NC nitrocellulose membranes (Cytiva, MA, USA) using a Trans-Blot Turbo Transfer System  
1063 (BioRad Hercules, CA, USA), blocked in blocking buffer (TBST: 50 mM Tris-HCl, 150 mM NaCl,  
1064 pH 7.4, 0.1 % Tween-20 supplemented with 5% non-fat dry milk) for 30 min at RT and then  
1065 incubated with mouse anti-a-NTD and rabbit anti-CI primary antibodies (both 1:3,000 dil.) in  
1066 blocking buffer for 1 h at RT. After washing with TBST, blots were incubated with IRDye®  
1067 680RD goat anti-mouse and IRDye® 800CW goat anti-rabbit (both 1:10,000 dil.; LI-COR



1068 Biosciences, NE, USA) in blocking buffer for 1 h at RT in the dark. After washing with TBST,  
1069 proteins were then detected using a ChemiDoc MP system (BioRad. Hercules, CA, USA).

1070 *Protein crystal structure analysis*

1071 Interfaces of two protein complexes, SARS-CoV-2 Nsp16-Nsp10 (PDB ID: 6W4H [31]) and  
1072 SARS-CoV-1 Nsp10-Nsp14 (PDB ID: 5NFY [29]), were analyzed using PDBePISA software  
1073 (*insert ref 20*). Amino acids involved in hydrogen bond formation or substantially contributing to  
1074 hydrophobic contacts in each complex were subjected to alanine mutagenesis and tested in  
1075 B2H assays. Structural images were prepared using PyMOL software (Schrodinger, LLC. 2010.  
1076 The PyMOL Molecular Graphics System, Version 2.4.1).

1077 *Statistical analysis*

1078 Presentation of bacterial two-hybrid data and statistical analysis using one-way or two-way  
1079 ANOVA with Tukey's or Dunnett's multiple comparison test was done using GraphPad Prism (v.  
1080 9.1.2; San Diego, CA, USA).

1081

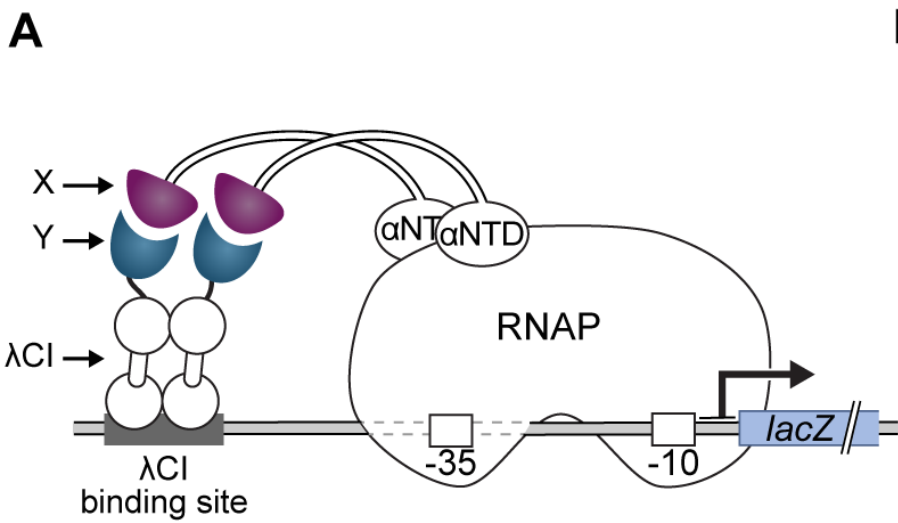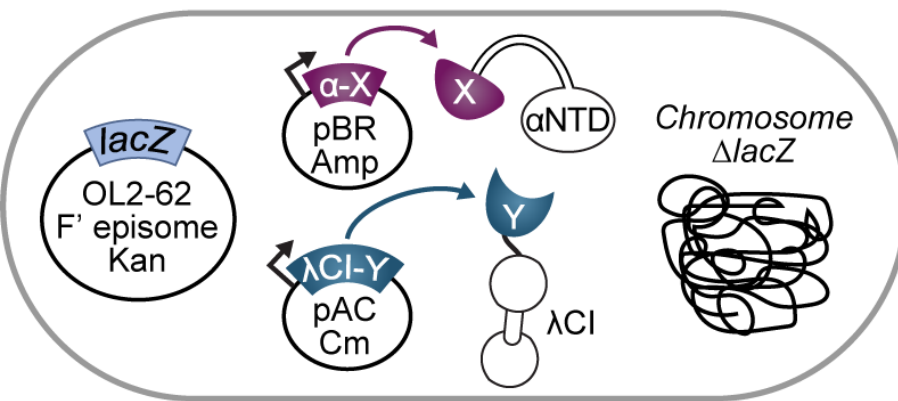

**B**

| ORF                       | Genomic locus (nt range) | AA    |
|---------------------------|--------------------------|-------|
| Nsp1                      | 266-805                  | 188   |
| Nsp2                      | 806-2719                 | 636   |
| Nsp3                      | 2720-8554                | 1,945 |
| Nsp4                      | 8555-10054               | 500   |
| Nsp5                      | 10055-10972              | 306   |
| Nsp6                      | 10973-11842              | 290   |
| Nsp7                      | 11843-12091              | 83    |
| Nsp8                      | 12092-12685              | 198   |
| Nsp9                      | 12686-13024              | 113   |
| Nsp10                     | 13025-13441              | 139   |
| Nsp11                     | 13442-13483              | 13    |
| Nsp12 (RNA-Polymerase)    | 13442-16236              | 932   |
| Nsp13 (Helicase)          | 16237-18039              | 601   |
| Nsp14 (3'-5' Exonuclease) | 18040-19620              | 527   |
| Nsp15 (endoRNase)         | 19621-20658              | 346   |
| Nsp16 (Methyltransferase) | 20659-21555              | 298   |
| Spike (S) ectodomain      | 21607-25201              | 1,201 |
| 3a                        | 25393-26220              | 275   |
| E                         | 26245-26472              | 75    |
| M                         | 26525-27191              | 222   |
| 6                         | 27202-27387              | 61    |
| 7a                        | 27397-27759              | 121   |
| 7b                        | 27756-27887              | 43    |
| 8                         | 27894-28259              | 121   |
| N                         | 28274-29533              | 419   |
| 10                        | 29558-29674              | 38    |

|       | Nsp1 | Nsp2        | Nsp3        | Nsp4 | Nsp5 | Nsp6        | Nsp7             | Nsp8 | Nsp9             | Nsp10       | Nsp11 | Nsp12 | Nsp13 | Nsp14 | Nsp15       | Nsp16 | 3a | 6 | 7a               | 7b | 8 | 10 | S                | M | N | E |  |
|-------|------|-------------|-------------|------|------|-------------|------------------|------|------------------|-------------|-------|-------|-------|-------|-------------|-------|----|---|------------------|----|---|----|------------------|---|---|---|--|
| Nsp1  |      |             |             |      |      |             |                  |      |                  |             |       |       |       |       |             |       |    |   |                  |    |   |    |                  |   |   |   |  |
| Nsp2  |      |             |             |      |      |             |                  |      |                  |             |       |       |       |       |             |       |    |   |                  |    |   |    |                  |   |   |   |  |
| Nsp3  |      | Interaction |             |      |      |             |                  |      |                  |             |       |       |       |       |             |       |    |   |                  |    |   |    |                  |   |   |   |  |
| Nsp4  |      |             |             |      |      |             |                  |      |                  |             |       |       |       |       |             |       |    |   |                  |    |   |    |                  |   |   |   |  |
| Nsp5  |      |             |             |      |      |             |                  |      |                  |             |       |       |       |       |             |       |    |   |                  |    |   |    |                  |   |   |   |  |
| Nsp6  |      |             |             |      |      |             |                  |      |                  |             |       |       |       |       |             |       |    |   |                  |    |   |    |                  |   |   |   |  |
| Nsp7  |      |             |             |      |      |             | Self-interaction |      |                  |             |       |       |       |       |             |       |    |   |                  |    |   |    |                  |   |   |   |  |
| Nsp8  |      |             |             |      |      | Interaction | Interaction      |      |                  |             |       |       |       |       |             |       |    |   |                  |    |   |    |                  |   |   |   |  |
| Nsp9  |      |             |             |      |      |             |                  |      | Self-interaction |             |       |       |       |       |             |       |    |   |                  |    |   |    |                  |   |   |   |  |
| Nsp10 |      |             |             |      |      |             |                  |      |                  |             |       |       |       |       |             |       |    |   |                  |    |   |    |                  |   |   |   |  |
| Nsp11 |      |             |             |      |      |             |                  |      | Interaction      |             |       |       |       |       |             |       |    |   |                  |    |   |    |                  |   |   |   |  |
| Nsp12 |      |             |             |      |      |             |                  |      |                  |             |       |       |       |       |             |       |    |   |                  |    |   |    |                  |   |   |   |  |
| Nsp13 |      |             |             |      |      |             |                  |      |                  |             |       |       |       |       |             |       |    |   |                  |    |   |    |                  |   |   |   |  |
| Nsp14 |      |             |             |      |      |             |                  |      |                  | Interaction |       |       |       |       |             |       |    |   |                  |    |   |    |                  |   |   |   |  |
| Nsp15 |      |             |             |      |      |             |                  |      |                  |             |       |       |       |       |             |       |    |   |                  |    |   |    |                  |   |   |   |  |
| Nsp16 |      |             |             |      |      |             |                  |      |                  | Interaction |       |       |       |       | Interaction |       |    |   |                  |    |   |    |                  |   |   |   |  |
| 3a    |      |             |             |      |      |             |                  |      |                  |             |       |       |       |       |             |       |    |   |                  |    |   |    |                  |   |   |   |  |
| 6     |      |             |             |      |      |             |                  |      |                  |             |       |       |       |       |             |       |    |   | Self-interaction |    |   |    |                  |   |   |   |  |
| 7a    |      |             |             |      |      |             |                  |      |                  |             |       |       |       |       |             |       |    |   |                  |    |   |    |                  |   |   |   |  |
| 7b    |      |             |             |      |      |             |                  |      |                  | Interaction |       |       |       |       |             |       |    |   |                  |    |   |    |                  |   |   |   |  |
| 8     |      |             |             |      |      |             |                  |      |                  |             |       |       |       |       |             |       |    |   |                  |    |   |    |                  |   |   |   |  |
| 10    |      |             |             |      |      |             |                  |      |                  | Interaction |       |       |       |       |             |       |    |   |                  |    |   |    |                  |   |   |   |  |
| S     |      |             |             |      |      |             |                  |      |                  |             |       |       |       |       |             |       |    |   |                  |    |   |    | Self-interaction |   |   |   |  |
| M     |      |             |             |      |      |             |                  |      | Interaction      |             |       |       |       |       |             |       |    |   |                  |    |   |    |                  |   |   |   |  |
| N     |      |             | Interaction |      |      |             |                  |      |                  |             |       |       |       |       |             |       |    |   |                  |    |   |    |                  |   |   |   |  |
| E     |      |             |             |      |      |             |                  |      |                  |             |       |       |       |       |             |       |    |   |                  |    |   |    |                  |   |   |   |  |

 Interaction
  Self-interaction

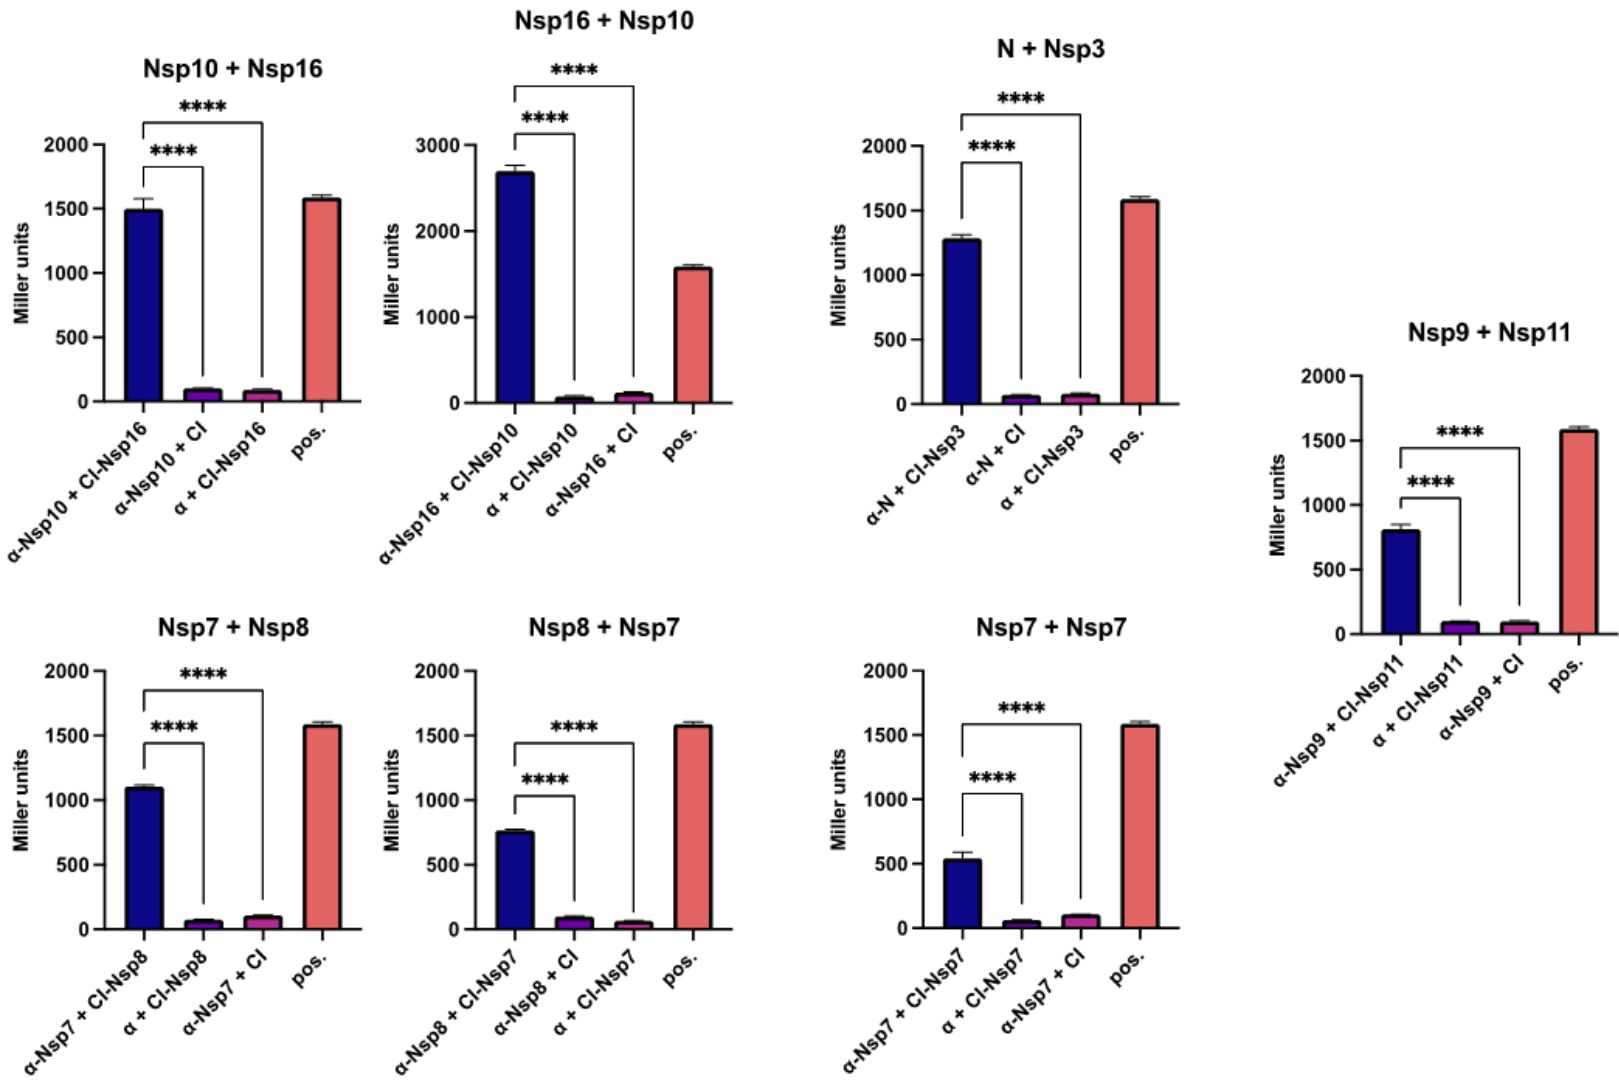

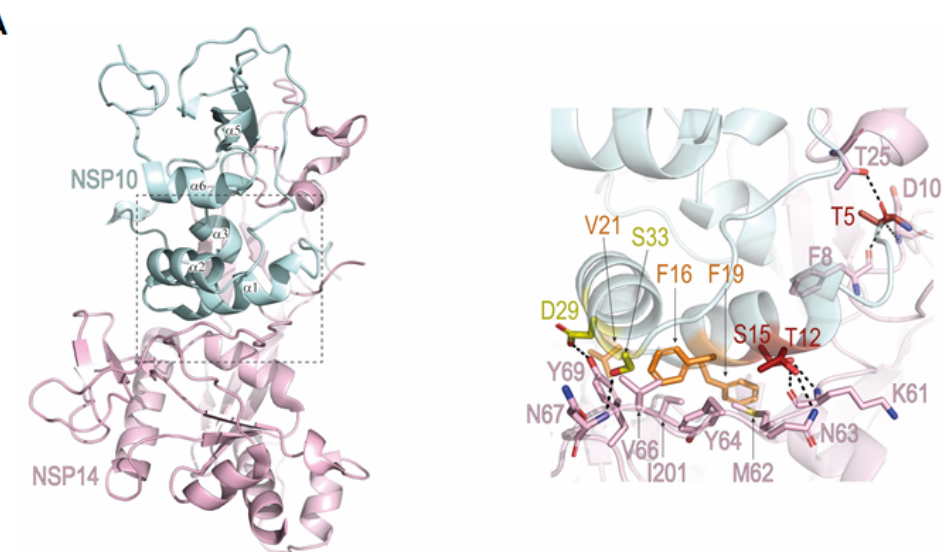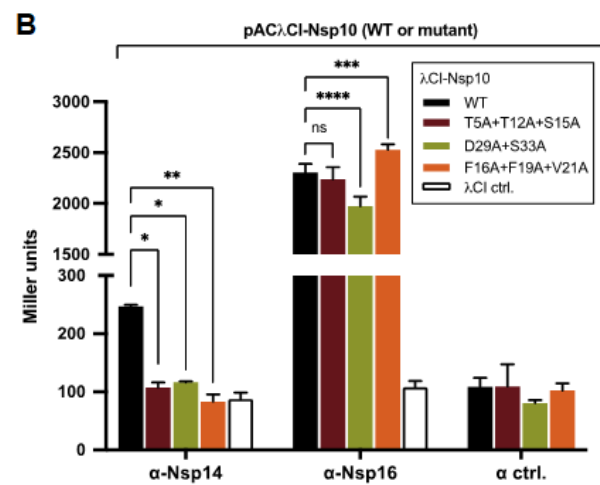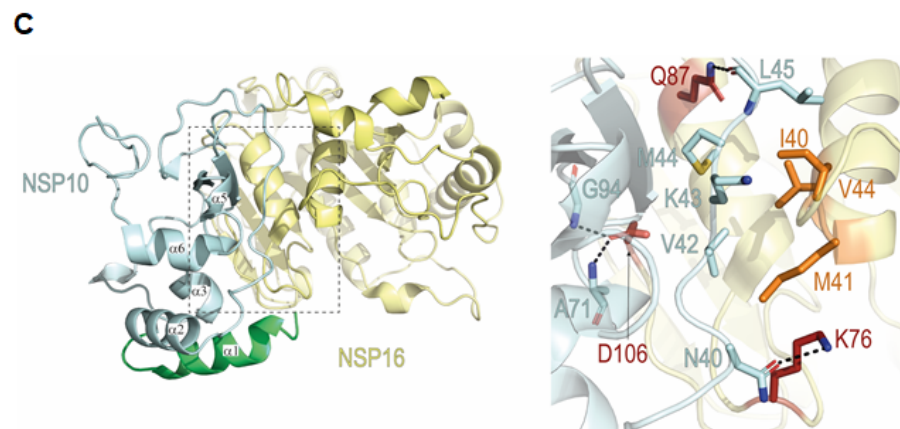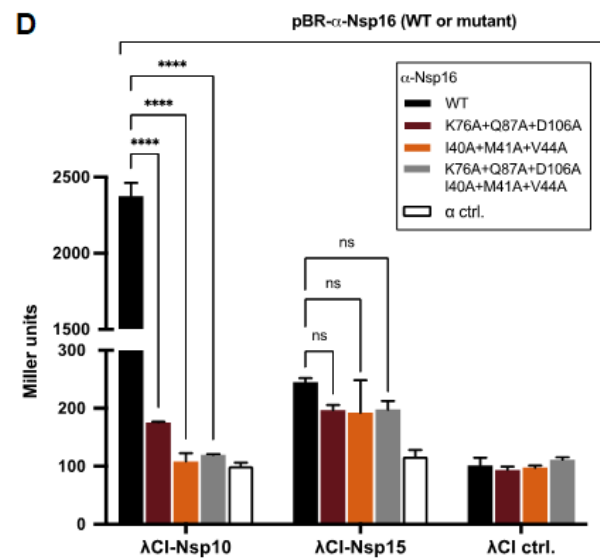

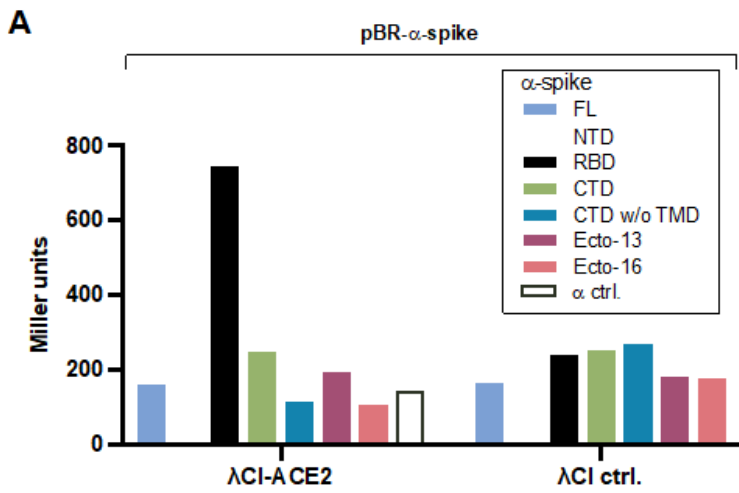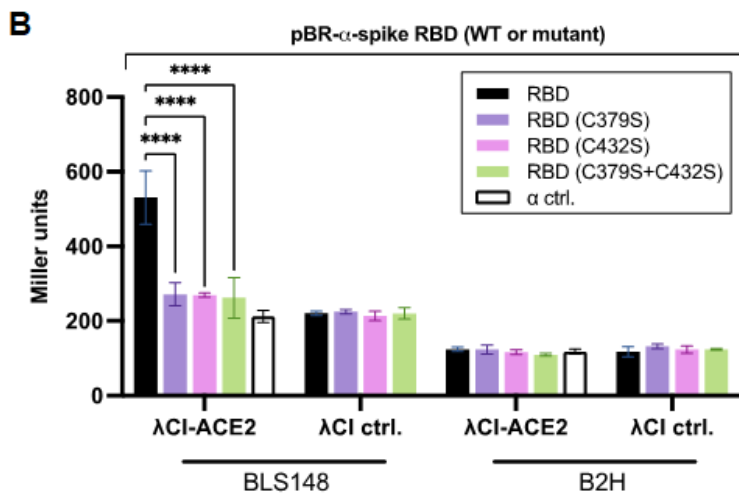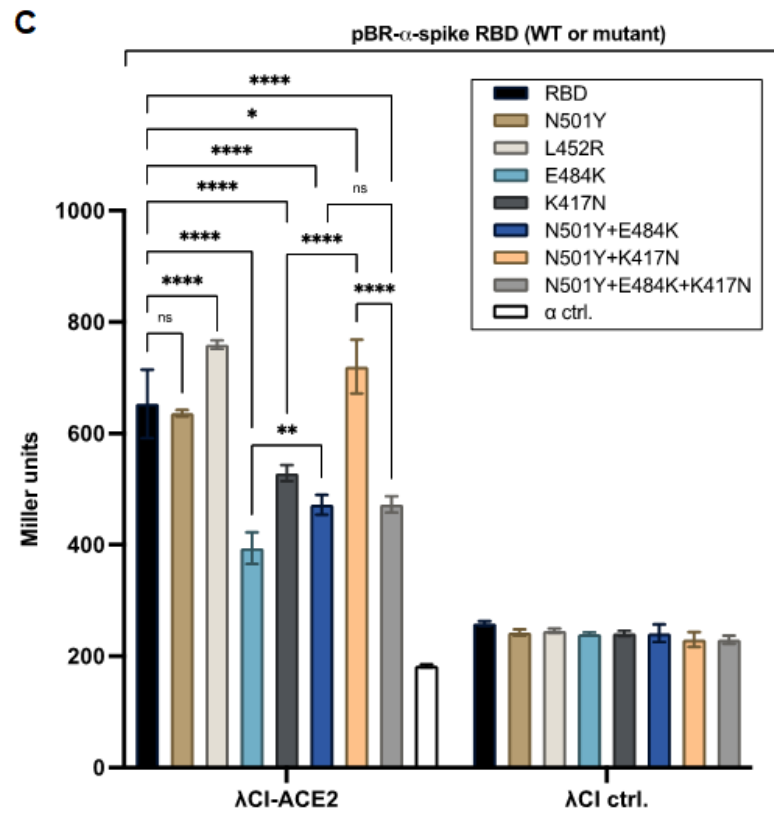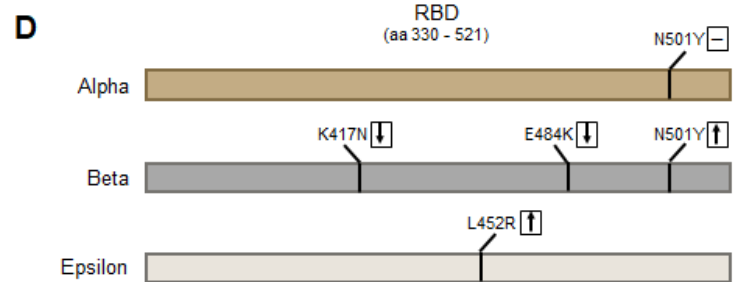

Source: https://biorxiv.org/content/10.1101/2021.10.07.463611v1.full.pdf
